# Supplementary material for: Synthesis of 4-methylene-4H-benzo[d][1,3]thiazines via a tandem reaction of 1-(2-alkynylphenyl)ketoximes with Lawesson's reagent
Source: Royal Society of Chemistry journal article supplement (doi:10.1039/c1cc12937f), 2011-01-01

# Synthesis of 4-Methylene-4*H*-benzo[*d*][1,3]thiazines via a Tandem Reaction of 1-(2-Alkynylphenyl)ketoximes with Lawesson's Reagent

Guanyinsheng Qiu,<sup>a</sup> Yi Hu,<sup>a</sup> Qiuping Ding,<sup>a</sup> Yiyuan Peng,<sup>\*a</sup> Xiangzheng Hu,<sup>c</sup> and Jie  
Wu<sup>\*b</sup>

<sup>a</sup> Key Laboratory of Functional Small Organic Molecules, Ministry of Education and College of Chemistry &  
Chemical Engineering, Jiangxi Normal University, Jiangxi 330022, China

<sup>b</sup> Department of Chemistry, Fudan University, 220 Handan Road, Shanghai 200433, China.

<sup>c</sup> College of Science, Tianjin University of Science and Technology, Tianjin 300222, China

*jie\_wu@fudan.edu.cn*

## Supporting information

1. General procedure for the synthesis of compounds **2** (S1)
2. Characterization data of compounds **2** (S2-S6).
3. <sup>1</sup>H and <sup>13</sup>C NMR spectra of compounds **2** (S7-S30)
4. X-ray ORTEP illustration of compound **2j** (S31)

### General Methods:

All reactions were performed in reaction tubes under nitrogen atmosphere. Flash column chromatography was performed using silica gel (60-Å pore size, 32–63 μm, standard grade). Analytical thin-layer chromatography was performed using glass plates pre-coated with 0.25 mm 230–400 mesh silica gel impregnated with a fluorescent indicator (254 nm). Thin layer chromatography plates were visualized by exposure to ultraviolet light. Organic solutions were concentrated on rotary evaporators at ~20 Torr (house vacuum) at 25–35 °C. Commercial reagents and solvents were used as received. Nuclear magnetic resonance (NMR) spectra are recorded in parts per million from internal tetramethylsilane on the δ scale.

*General procedure for the synthesis of 4-methylene-4H-benzo[d][1,3]thiazines via a tandem reaction of 1-(2-alkynylphenyl)ketoxime with Lawesson's reagent*

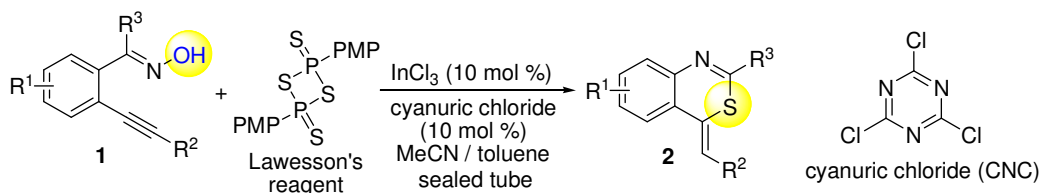

Cyanuric chloride (10 mol %) and InCl<sub>3</sub> (10 mol %) were added to a solution of 1-(2-alkynylphenyl)ketoxime **1** (0.2 mmol) in MeCN (0.5 mL). The mixture was stirred at 80 °C under N<sub>2</sub>. After consumption of 1-(2-alkynylphenyl)ketoxime **1**, Lawesson's reagent (0.8 equiv) and toluene (2.0 mL) were then added. The reaction was stirred overnight at 120 °C. After completion of reaction as indicated by TLC, the mixture was cooled to room temperature and separated directly by flash chromatography column on silica gel to afford the corresponding product **2**.

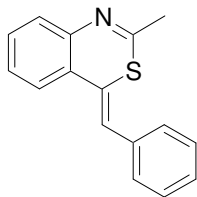

4-Benzylidene-2-methyl-4*H*-benzo[*d*][1,3]thiazine (**2a**)

$^1\text{H}$  NMR (400 MHz,  $\text{CDCl}_3$ )  $\delta$  2.35 (s, 3H), 7.02 (s, 1H), 7.37-7.43 (m, 8H), 7.61 (d,  $J = 8.0$  Hz, 1H);  $^{13}\text{C}$  NMR (100 MHz,  $\text{CDCl}_3$ )  $\delta$  27.3, 121.2, 124.1, 124.6, 126.3, 127.4, 128.2, 128.3, 128.6, 129.1, 129.7, 135.6, 142.1, 158.6; HRMS Calcd for  $\text{C}_{16}\text{H}_{13}\text{NS}$  (ESI,  $\text{M}^+\text{+H}$ ): 252.0847; Found: 252.0850.

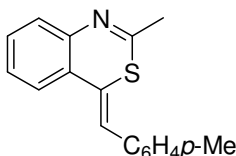

2-Methyl-4-(4-methyl-benzylidene)-4*H*-benzo[*d*][1,3]thiazine (**2b**)

$^1\text{H}$  NMR (400 MHz,  $\text{CDCl}_3$ )  $\delta$  2.33 (s, 3H), 2.37 (s, 3H), 6.97 (s, 1H), 7.19-7.36 (m, 7H), 7.60 (d,  $J = 8.0$  Hz, 1H);  $^{13}\text{C}$  NMR (100 MHz,  $\text{CDCl}_3$ )  $\delta$  21.5, 27.6, 121.8, 124.3, 124.8, 125.4, 128.3, 128.7, 129.1, 129.2, 129.6, 133.0, 137.6, 142.2, 158.9; HRMS Calcd for  $\text{C}_{17}\text{H}_{15}\text{NS}$  (ESI,  $\text{M}^+\text{+H}$ ): 266.1003; Found: 266.1009.

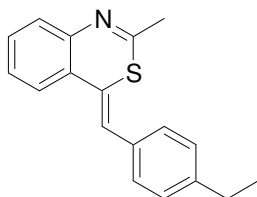

4-(4-Ethylbenzylidene)-2-methyl-4*H*-benzo[*d*][1,3]thiazine (**2c**)

$^1\text{H}$  NMR (400 MHz,  $\text{CDCl}_3$ )  $\delta$  1.26 (t,  $J = 8.0$  Hz, 3H), 2.35 (s, 3H), 2.65-2.71 (m, 2H), 6.99 (s, 1H), 7.24 (d,  $J = 8.0$  Hz, 2H), 7.32-7.37 (m, 5H), 7.58 (d,  $J = 8.0$  Hz, 1H);  $^{13}\text{C}$  NMR (100 MHz,  $\text{CDCl}_3$ )  $\delta$  15.4, 27.5, 28.7, 121.5, 124.2, 124.8, 125.2, 127.8, 128.2, 128.6, 129.2, 129.6, 133.1, 142.1, 143.8, 158.9; HRMS Calcd for  $\text{C}_{18}\text{H}_{17}\text{NS}$  (ESI,  $\text{M}^+\text{+H}$ ): 280.1160; Found: 280.1163.

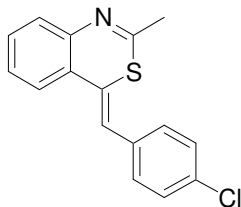

4-(4-Chlorobenzylidene)-2-methyl-4*H*-benzo[*d*][1,3]thiazine (**2d**)

$^1\text{H}$  NMR (400 MHz,  $\text{CDCl}_3$ )  $\delta$  2.36 (s, 3H), 6.94 (s, 1H), 7.25-7.41 (m, 7H), 7.59 (d,  $J = 8.0$  Hz, 1H);  $^{13}\text{C}$  NMR (100 MHz,  $\text{CDCl}_3$ )  $\delta$  27.4, 120.9, 123.1, 124.0, 127.1, 128.3, 128.4, 128.6, 128.8, 129.9, 130.3, 133.0, 134.1, 142.1, 158.1; HRMS Calcd for  $\text{C}_{16}\text{H}_{12}\text{ClNS}$  (ESI,  $\text{M}^+\text{+H}$ ): 286.0457; Found: 286.0463.

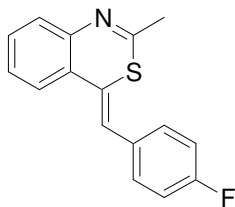

4-(4-Fluorobenzylidene)-2-methyl-4*H*-benzo[*d*][1,3]thiazine (**2e**)

$^1\text{H}$  NMR (400 MHz,  $\text{CDCl}_3$ )  $\delta$  2.37 (s, 3H), 6.97 (s, 1H), 7.26-7.42 (m, 7H), 7.59 (d,  $J = 7.6$  Hz, 1H);  $^{13}\text{C}$  NMR (100 MHz,  $\text{CDCl}_3$ )  $\delta$  27.4, 115.2 (d,  $^2J_{\text{CF}} = 21$  Hz), 121.1, 123.4, 124.0, 126.1, 128.3, 128.6, 129.8, 130.8 (d,  $^3J_{\text{CF}} = 8.0$  Hz), 131.8 (d,  $^4J_{\text{CF}} = 3.0$  Hz), 142.0, 158.4, 161.7 (d,  $^1J_{\text{CF}} = 247$  Hz); HRMS Calcd for  $\text{C}_{16}\text{H}_{12}\text{FNS}$  (ESI,  $\text{M}^+\text{+H}$ ): 270.0753; Found: 270.0740.

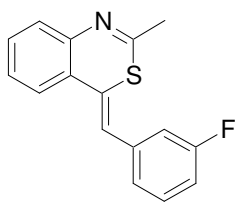

4-(3-Fluoro-benzylidene)-2-methyl-4*H*-benzo[*d*][1,3]thiazine (**2f**)

$^1\text{H}$  NMR (400 MHz,  $\text{CDCl}_3$ )  $\delta$  2.38 (s, 3H), 6.97 (s, 1H), 7.21 (d,  $J = 8.4$  Hz, 2H), 7.34-7.43 (m, 5H), 7.61 (d,  $J = 8.0$  Hz, 1H);  $^{13}\text{C}$  NMR (100 MHz,  $\text{CDCl}_3$ )  $\delta$  27.5, 114.3 (d,  $^2J_{\text{CF}} = 21$  Hz), 115.6 (d,  $^2J_{\text{CF}} = 22$  Hz), 120.7, 123.0, 124.0, 125.0 (d,  $^4J_{\text{CF}} = 3.0$  Hz), 127.8, 128.4, 128.8, 129.4, 129.7 (d,  $^3J_{\text{CF}} = 8.0$  Hz), 130.0, 137.8 (d,  $^3J_{\text{CF}} = 8.0$  Hz), 142.0, 158.3, 162.5 (d,  $^1J_{\text{CF}} = 244$  Hz); HRMS Calcd for  $\text{C}_{16}\text{H}_{12}\text{FNS}$  (ESI,  $\text{M}^+\text{+H}$ ): 270.0753; Found: 270.0737.

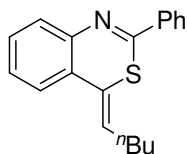

4-Pentylidene-2-phenyl-4*H*-benzo[*d*][1,3]thiazine (**2g**)

$^1\text{H}$  NMR (400 MHz,  $\text{CDCl}_3$ )  $\delta$  0.90 (t,  $J = 7.6$  Hz, 3H), 1.34-1.40 (m, 2H), 1.43-1.50 (m, 2H), 2.25-2.31 (m, 2H), 6.45 (t,  $J = 7.6$  Hz, 1H), 7.12-7.25 (m, 3H), 7.39-7.45 (m, 3H), 7.49-7.53 (m, 1H), 7.72 (d,  $J = 8.0$  Hz, 1H), 8.10 (d,  $J = 7.6$  Hz, 1H);  $^{13}\text{C}$  NMR (100 MHz,  $\text{CDCl}_3$ )  $\delta$  13.9, 22.4, 31.1, 31.5, 120.4, 120.4, 123.3, 123.4, 124.8, 128.4, 129.3, 131.3, 134.5, 137.4, 141.2, 152.0, 164.3; HRMS Calcd for  $\text{C}_{19}\text{H}_{19}\text{NS}$  (ESI,  $\text{M}^+\text{+H}$ ): 294.1316; Found:

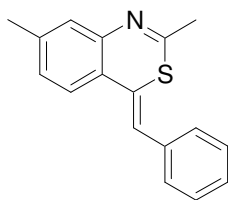

(*Z*)-4-Benzylidene-2,7-dimethyl-4*H*-benzo[*d*][1,3]thiazine (**2h**)

$^1\text{H}$  NMR (400 MHz,  $\text{CDCl}_3$ )  $\delta$  2.32 (s, 3H), 2.37 (s, 3H), 6.96 (s, 1H), 7.12 (d,  $J = 8.0$  Hz, 1H), 7.18 (s, 1H), 7.27 (d,  $J = 7.0$  Hz, 1H), 7.36-7.48 (m, 4H), 7.49 (d,  $J = 8.0$  Hz, 1H);  $^{13}\text{C}$  NMR (100 MHz,  $\text{CDCl}_3$ )  $\delta$  21.0, 27.4, 118.4, 123.3, 123.9, 126.4, 127.3, 128.2, 128.6, 129.0, 129.1, 135.8, 139.9, 141.9, 158.5; HRMS Calcd for  $\text{C}_{17}\text{H}_{15}\text{NS}$  (ESI,  $\text{M}^+\text{+H}$ ): 266.1003; Found: 266.1021.

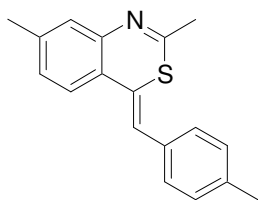

2,7-Dimethyl-4-(4-methylbenzylidene)-4*H*-benzo[*d*][1,3]thiazine (**2i**)

$^1\text{H}$  NMR (400 MHz,  $\text{CDCl}_3$ )  $\delta$  2.33 (s, 3H), 2.37 (s, 3H), 2.38 (s, 3H), 6.93 (s, 1H), 7.12 (d,  $J = 7.6$  Hz, 1H), 7.18-7.21 (m, 3H), 7.32 (d,  $J = 7.6$  Hz, 2H), 7.48 (d,  $J = 7.6$  Hz, 1H),  $^{13}\text{C}$  NMR (100 MHz,  $\text{CDCl}_3$ )  $\delta$  21.0, 21.3, 27.4, 118.6, 123.4, 123.9, 125.4, 128.9, 129.0, 129.1, 133.0, 137.2, 139.7, 141.9, 158.7; HRMS Calcd for  $\text{C}_{18}\text{H}_{17}\text{NS}$

(ESI,  $M^+H$ ): 280.1160; Found: 280.1163.

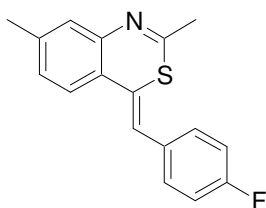

4-(3-Fluoro-benzylidene)-2,7-dimethyl-4H-benzo[d][1,3]thiazine (**2j**)

$^1H$  NMR (400 MHz,  $CDCl_3$ )  $\delta$  2.34 (s, 3H), 2.38 (s, 3H), 6.91 (s, 1H), 7.02-7.14 (m, 3H), 7.18 (s, 1H), 7.37-7.41 (m, 2H), 7.50 (d,  $J = 8.0$  Hz, 1H);  $^{13}C$  NMR (100 MHz,  $CDCl_3$ )  $\delta$  21.0, 27.5, 115.3 (d,  $^2J_{CF} = 21$  Hz), 118.2, 122.0, 123.8, 126.4, 129.2 (d,  $^4J_{CF} = 4.0$  Hz), 130.7 (d,  $^3J_{CF} = 8.0$  Hz), 132.0, 140.0, 141.9, 158.1, 161.7 (d,  $^1J_{CF} = 247$  Hz); HRMS Calcd for  $C_{17}H_{14}FNS$  (ESI,  $M^+H$ ): 284.0909; Found: 284.0922.

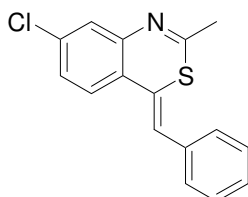

4-Benzylidene-7-chloro-2-methyl-4H-benzo[d][1,3]thiazine (**2k**)

$^1H$  NMR (400 MHz,  $CDCl_3$ )  $\delta$  2.25 (s, 3H), 6.87 (s, 1H), 7.16-7.33 (m, 7H), 7.41 (d,  $J = 8.4$  Hz, 1H);  $^{13}C$  NMR (100 MHz,  $CDCl_3$ )  $\delta$  27.5, 119.9, 125.0, 125.3, 125.3, 127.7, 128.1, 128.3, 128.4, 129.1, 135.1, 135.4, 143.3, 160.5; HRMS Calcd for  $C_{16}H_{12}ClNS$  (ESI,  $M^+H$ ): 286.0457; Found: 286.0479.

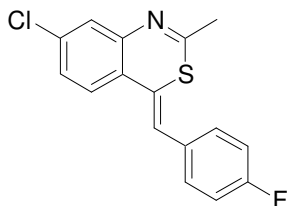

7-Chloro-4-(4-fluoro-benzylidene)-2-methyl-4H-benzo[d][1,3]thiazine (**2l**)

$^1H$  NMR (400 MHz,  $CDCl_3$ )  $\delta$  2.35 (s, 3H), 6.92 (s, 1H), 7.08-7.12 (m, 2H), 7.26-7.30 (m, 1H), 7.36-7.41 (m, 3H), 7.50 (d,  $J = 8.4$  Hz, 1H);  $^{13}C$  NMR (100 MHz,  $CDCl_3$ )  $\delta$  27.5, 115.3 (d,  $^2J_{CF} = 22$  Hz), 119.7, 123.8, 125.2, 128.2, 128.5, 130.8 (d,  $^3J_{CF} = 8.0$  Hz), 131.6, 143.3, 160.2; HRMS Calcd for  $C_{16}H_{11}ClFNS$  (ESI,  $M^+H$ ): 304.0363; Found: 304.0359.

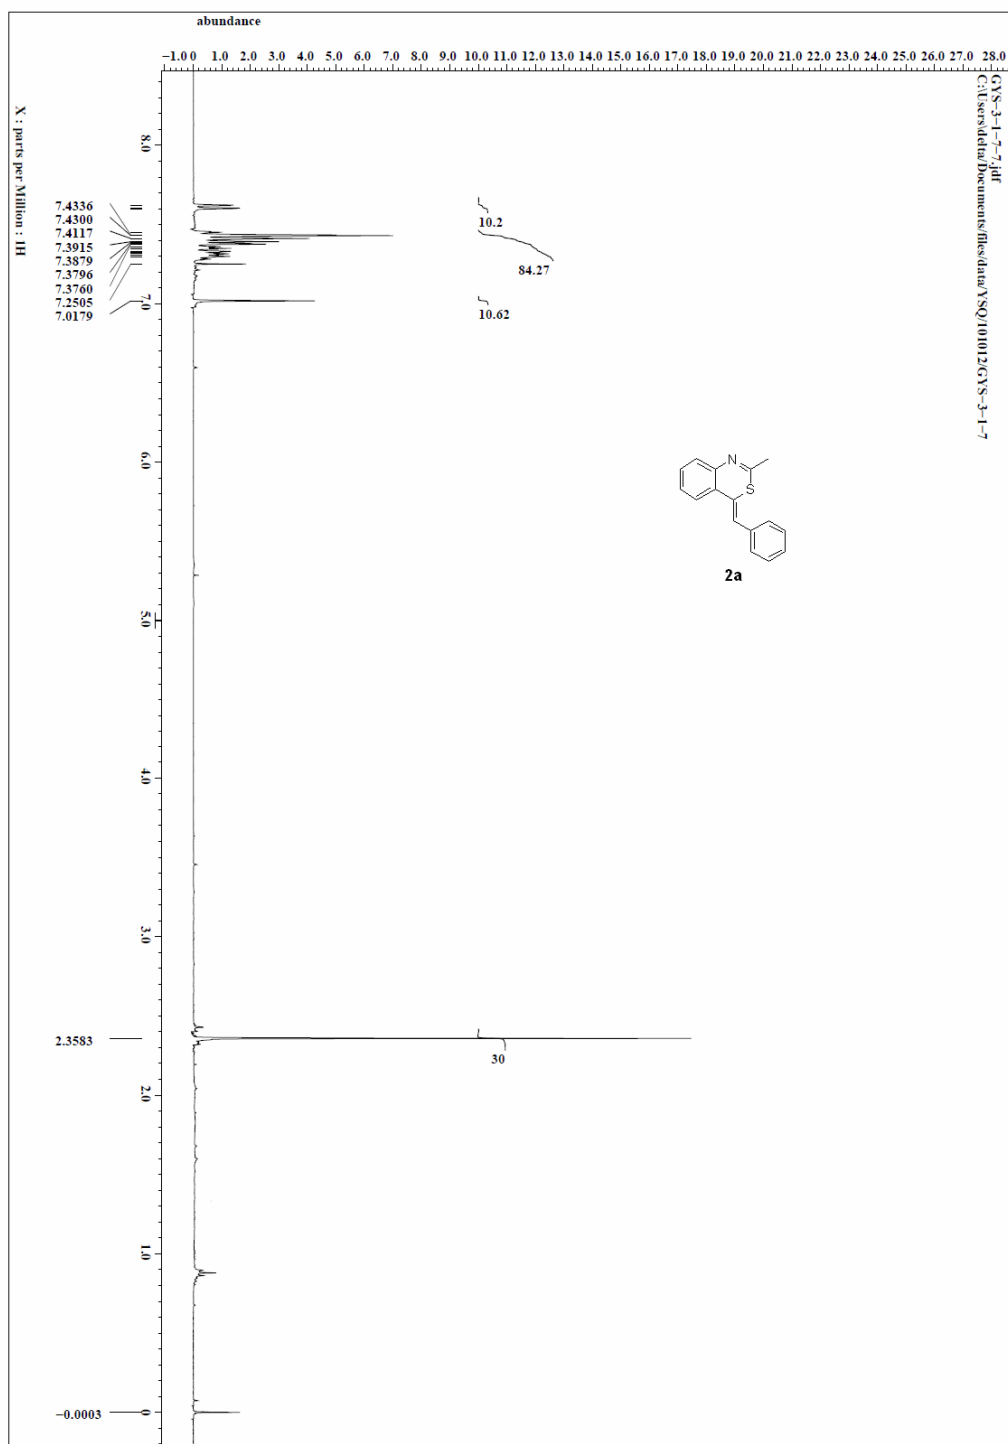

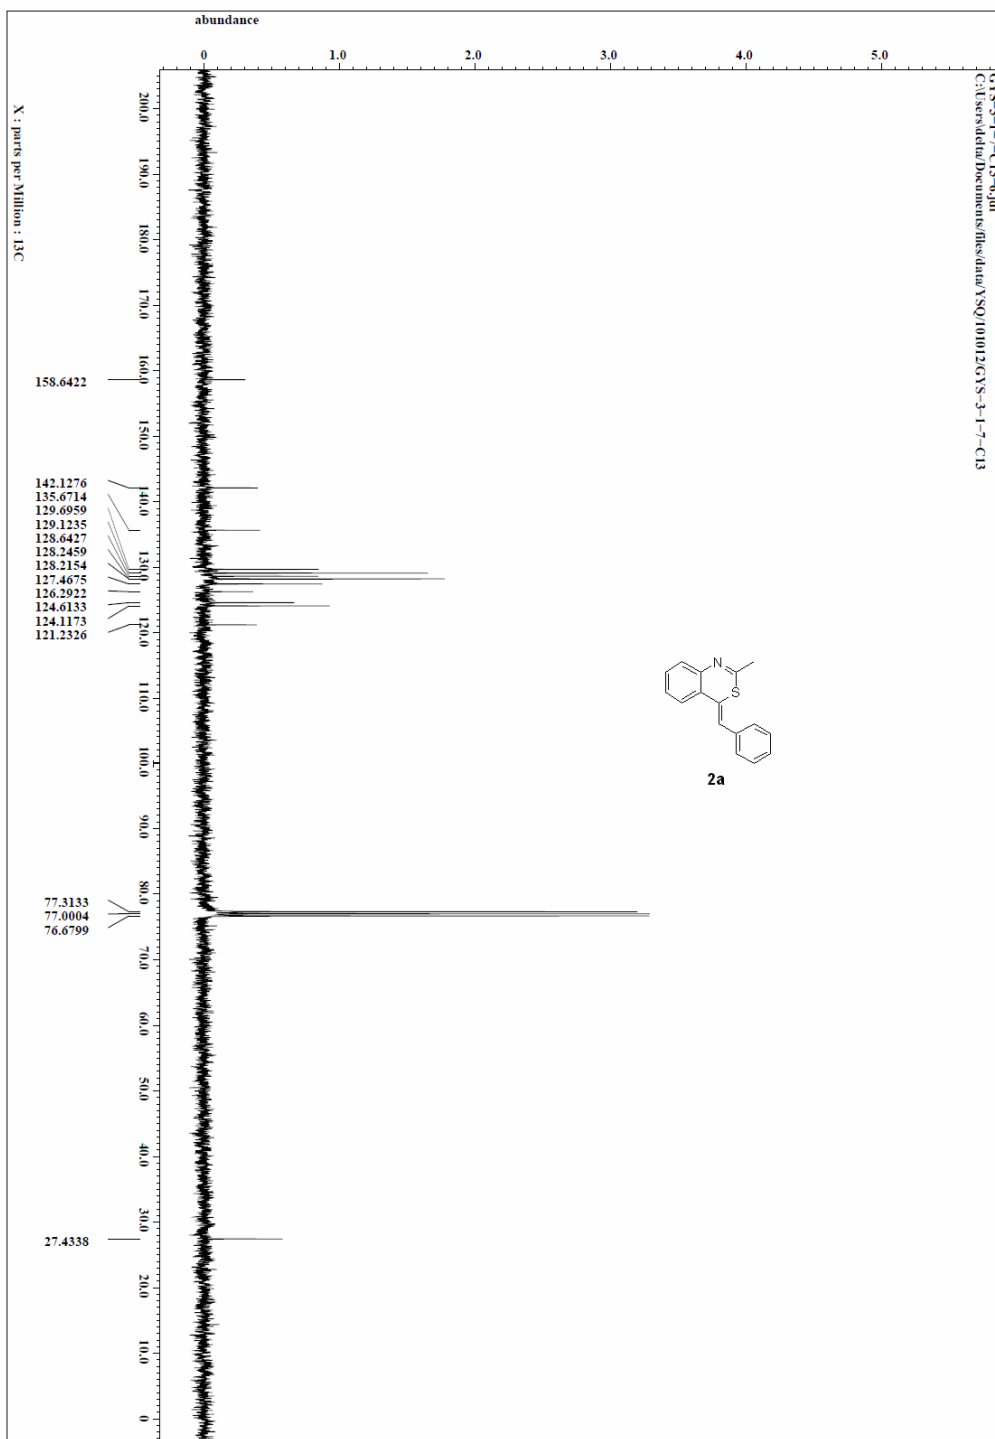



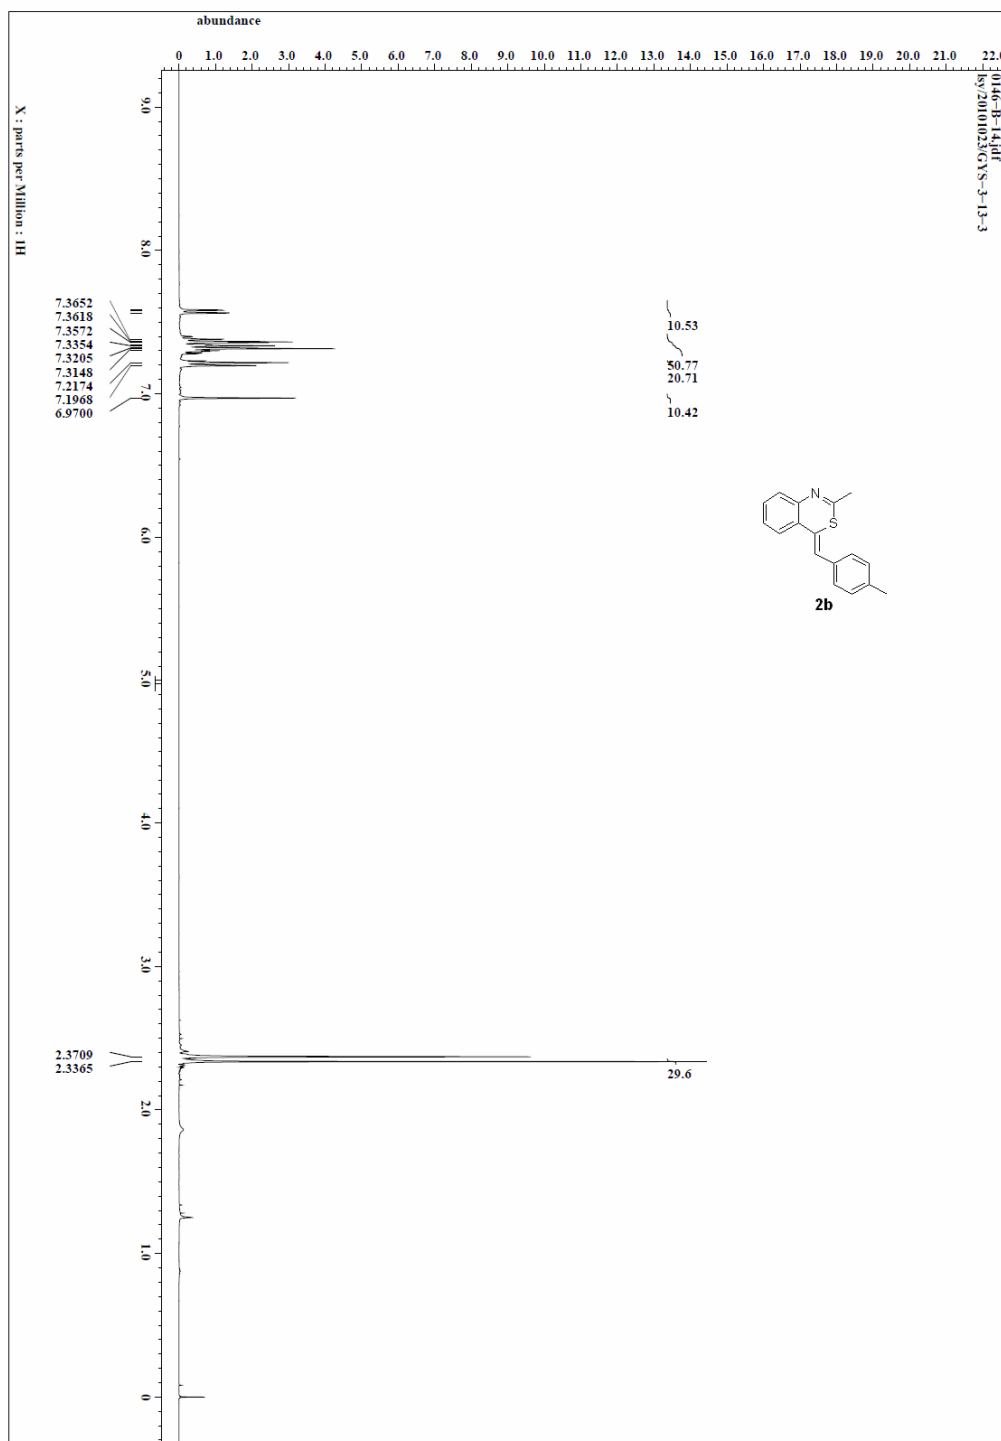

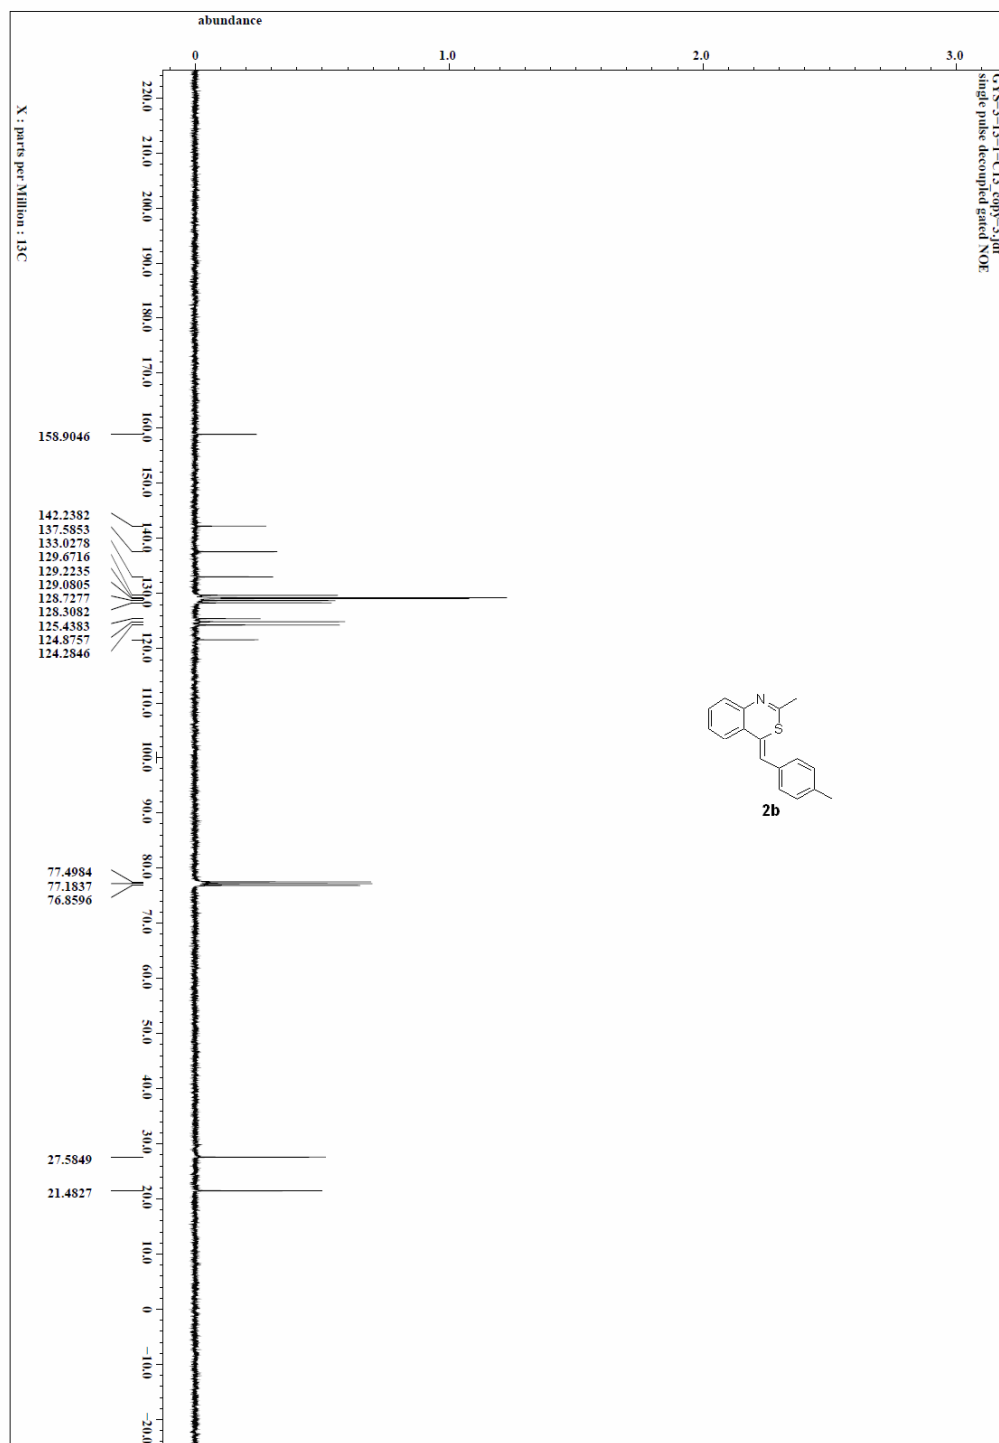

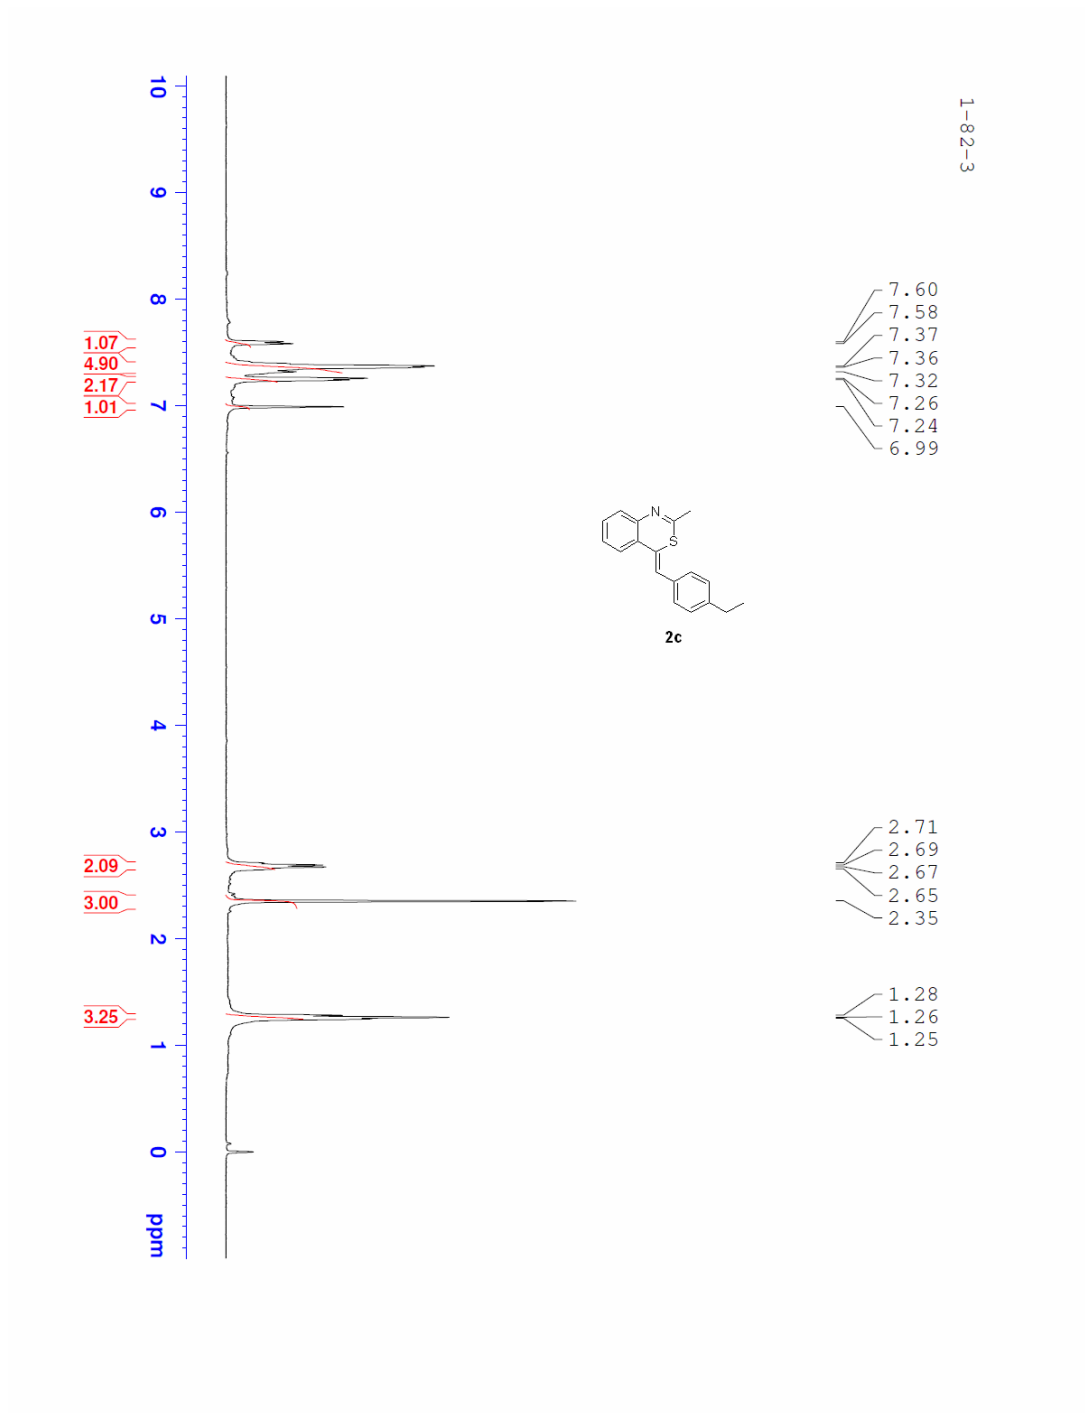

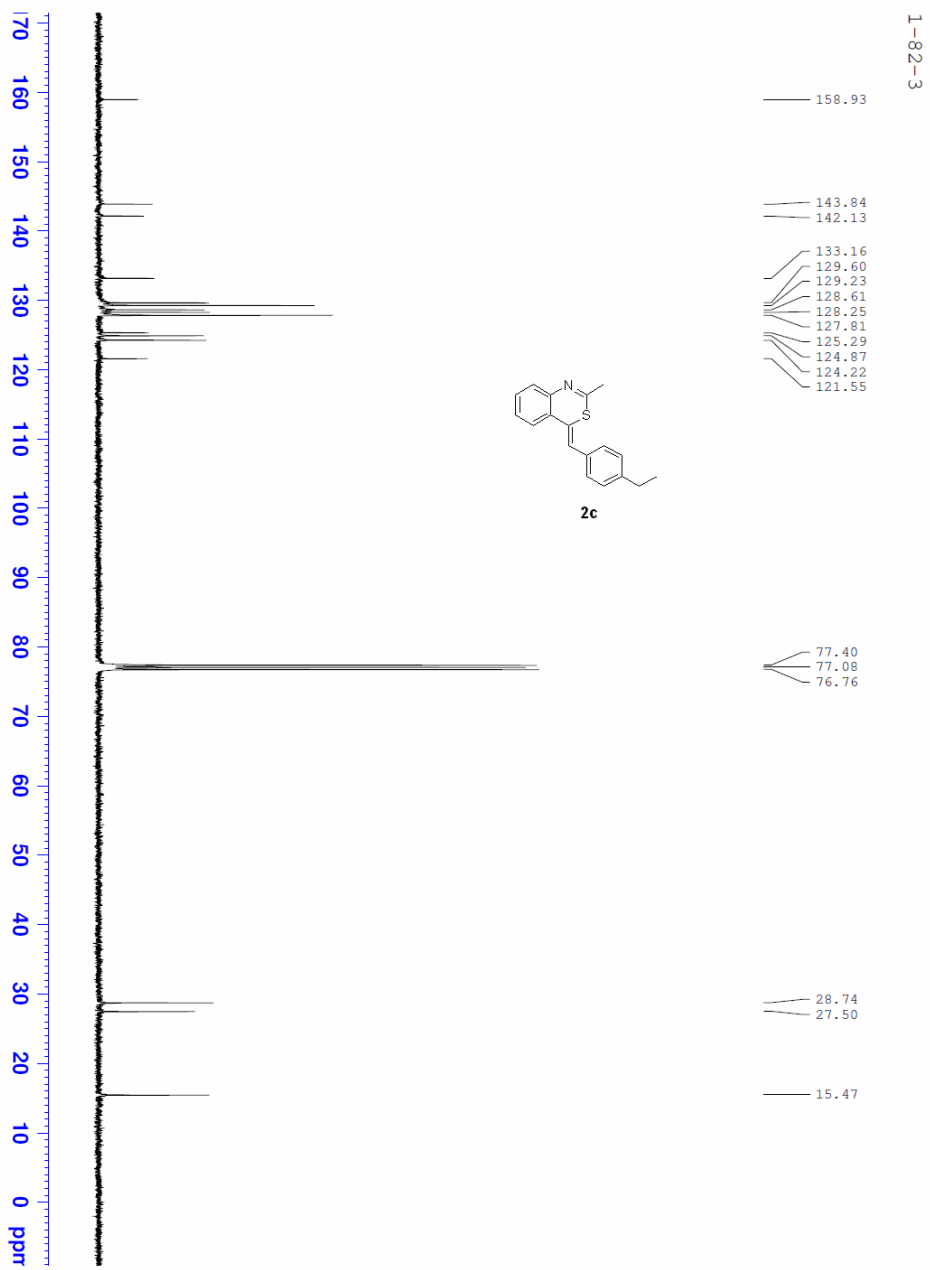

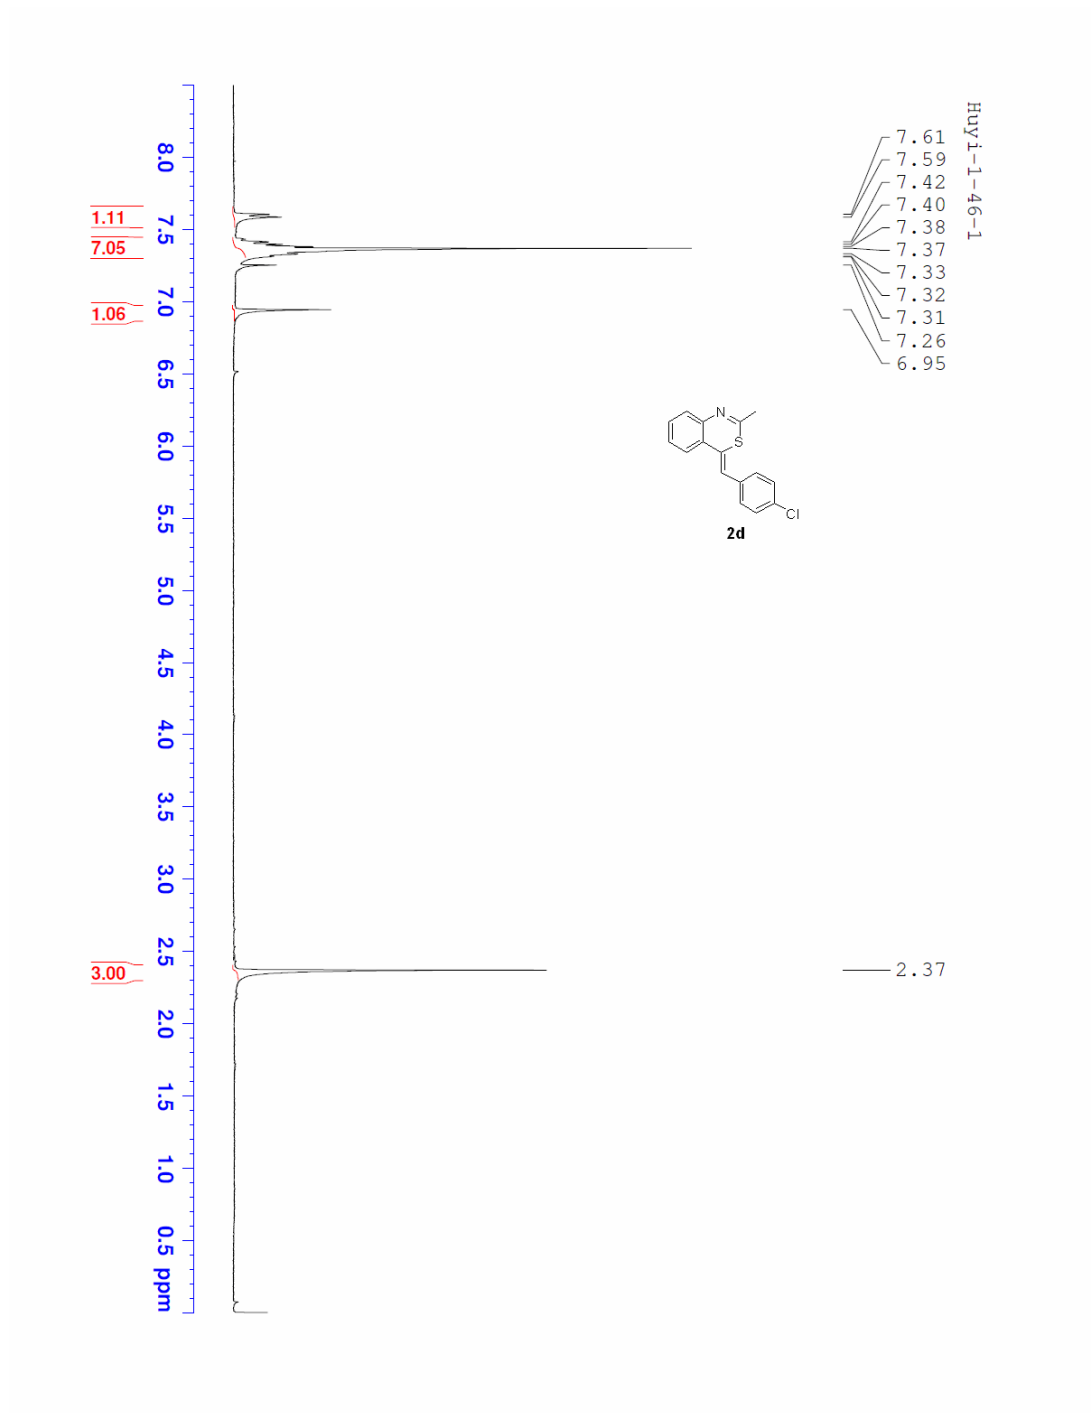

Huy1-1-46-1

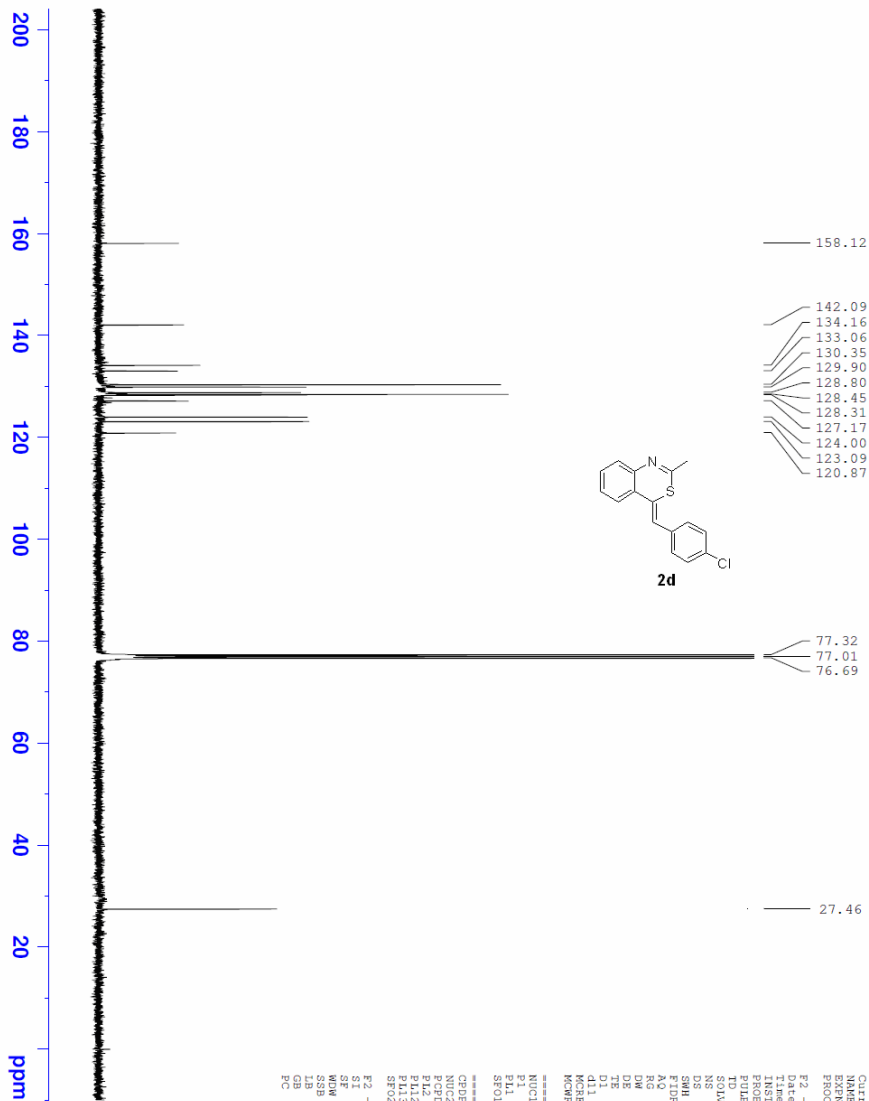

Current Data Parameters

|        |      |
|--------|------|
| NAME   | HUY1 |
| EXPNO  | 2    |
| PROCNO | 1    |

F2 - Acquisition Parameters

|         |                |
|---------|----------------|
| Time    | 0.28           |
| INSTRUM | 5 mm BBO AV400 |
| PROBHD  | 5 mm BBO-H1H   |
| PULPROG | zgpg30         |
| TD      | 65536          |
| TD0     | 65536          |
| TD1     | 65536          |
| TD2     | 65536          |
| TD3     | 65536          |
| SOLVENT | CDCl3          |
| DS      | 3072           |
| SS      | 23980.814 Hz   |
| SMH     | 0.365918 Hz    |
| FIDRES  | 1.15852        |
| RG      | 20.850 usec    |
| DW      | 20.850 usec    |
| DE      | 5.00 usec      |
| TE      | 29.2           |
| DI      | 2.00000000 sec |
| d11     | 0.03000000 sec |
| MCRESPT | 0.02000000 sec |
| MMMR    | 0.02000000 sec |

===== CHANNEL f1 =====

|      |                 |
|------|-----------------|
| NUC1 | 13C             |
| PL1  | 8.50 usec       |
| PL12 | -2.00 dB        |
| SFO1 | 100.6282828 MHz |

===== CHANNEL f2 =====

|         |                 |
|---------|-----------------|
| CPDPRG2 | waltz16         |
| NUC2    | 1H              |
| PL2     | 90.1H usec      |
| PL12    | -3.00 dB        |
| PL13    | 16.27 dB        |
| PL14    | 16.00 dB        |
| PL15    | 16.00 dB        |
| SFO2    | 400.1300013 MHz |

F2 - Processing parameters

|     |                 |
|-----|-----------------|
| SF  | 100.6127278 MHz |
| WDW | EM              |
| SSB | 0               |
| GB  | 1.00 Hz         |
| PC  | 1.40            |

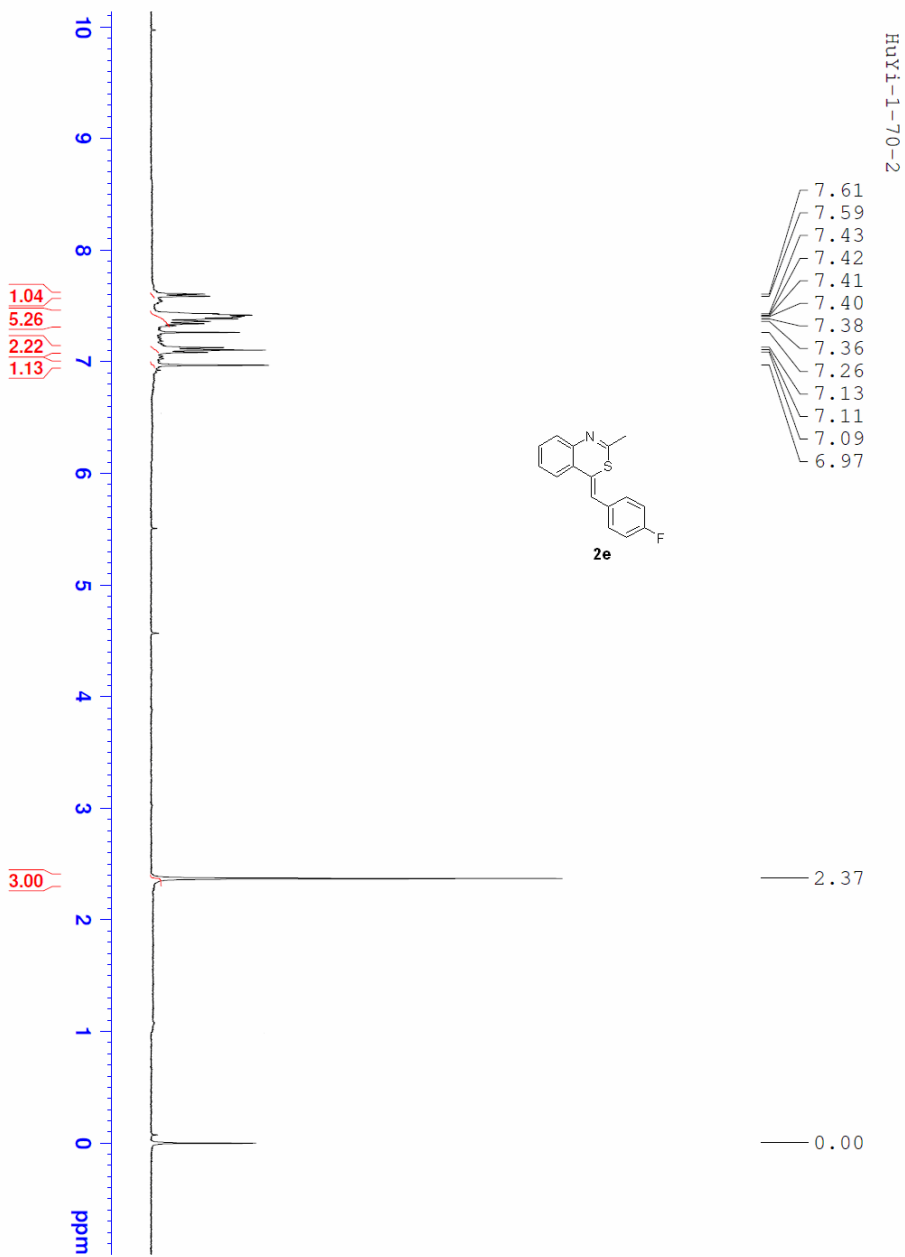

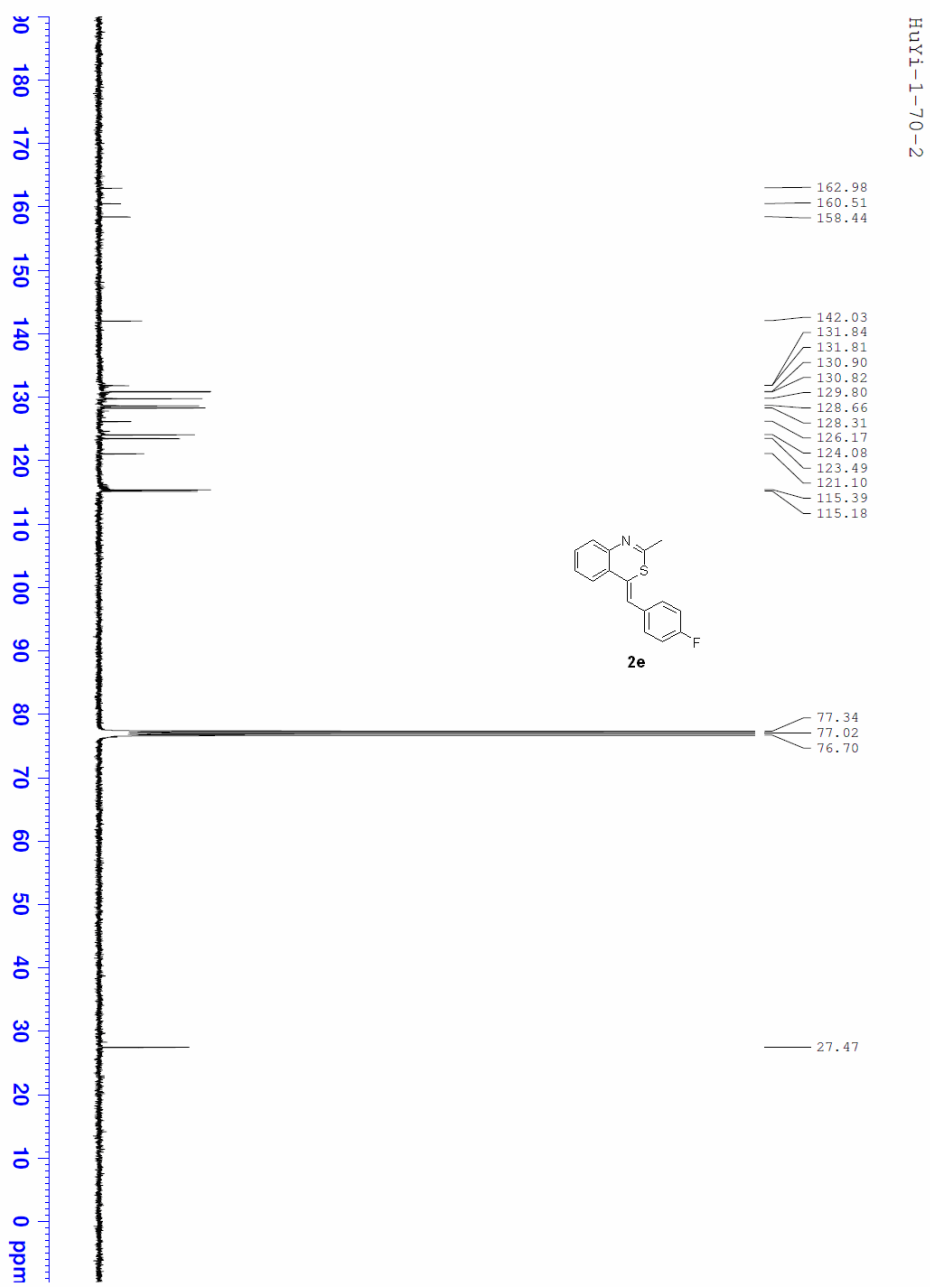



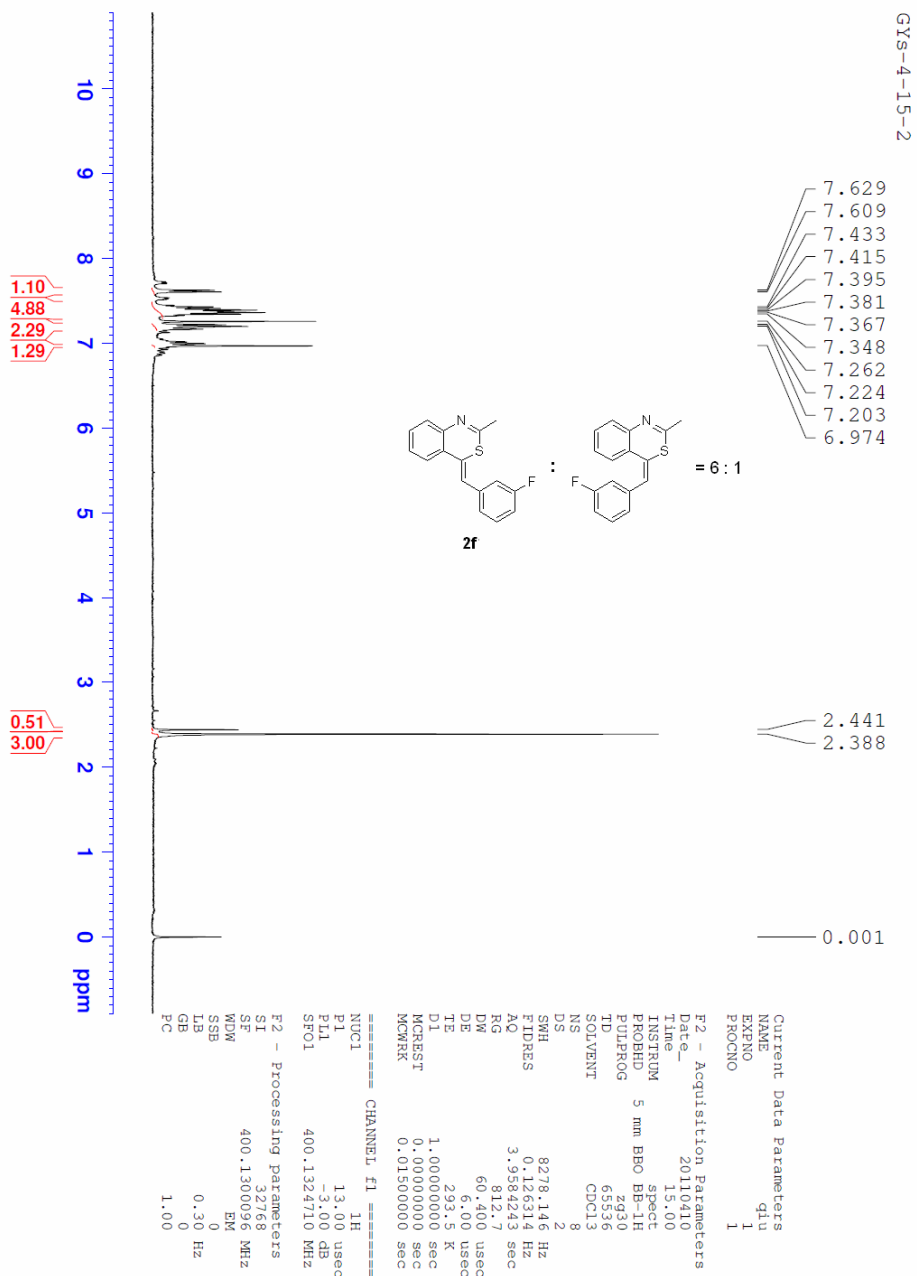

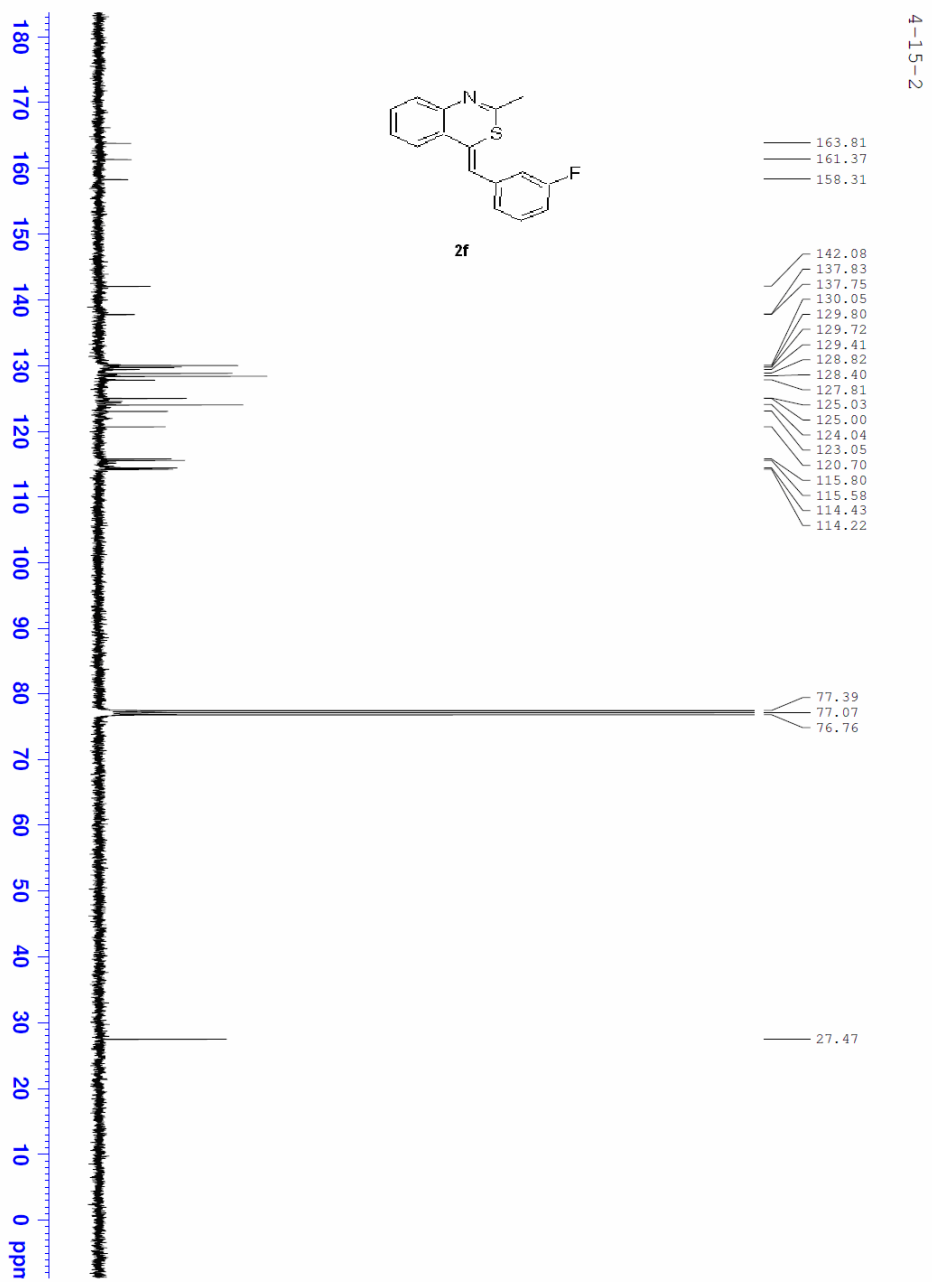

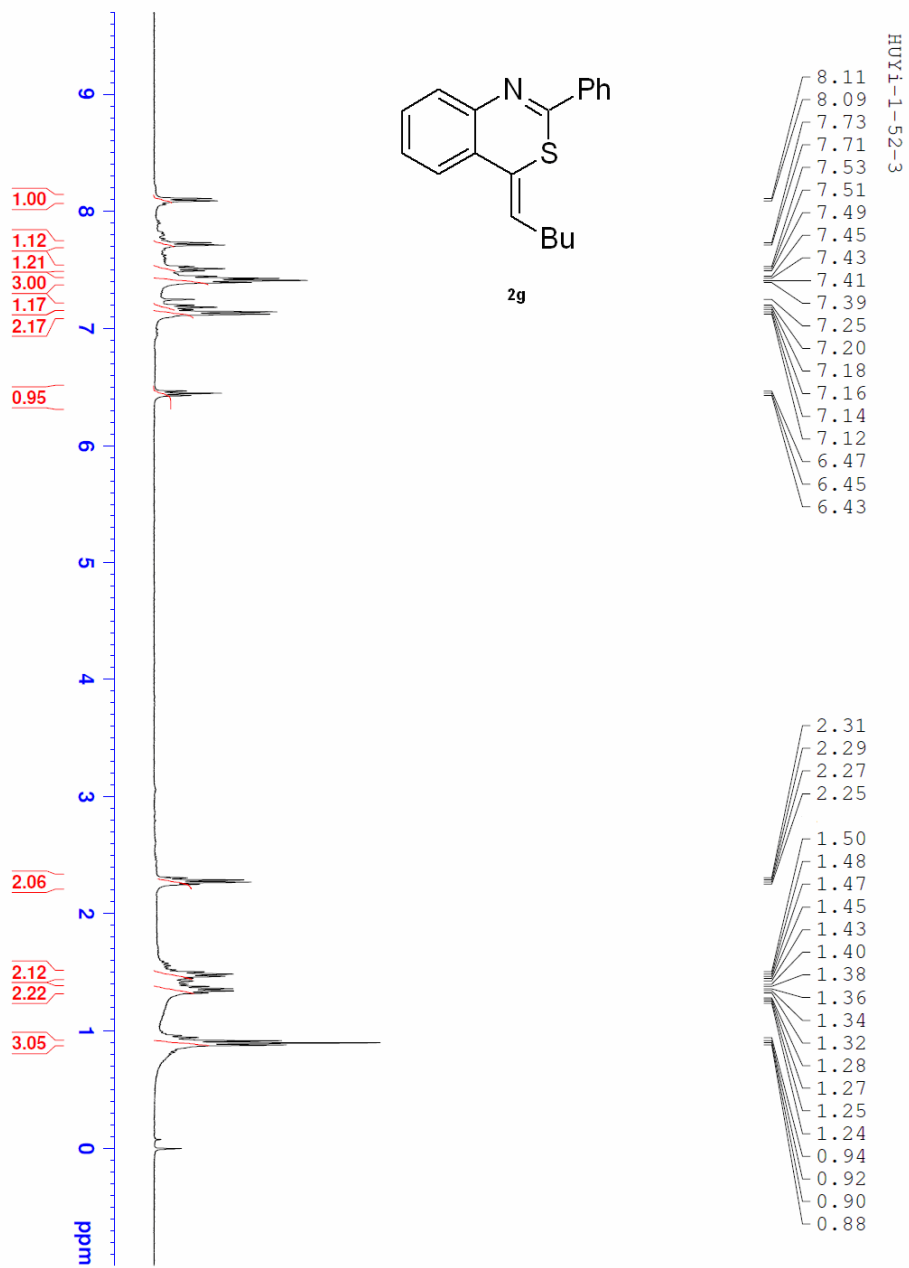

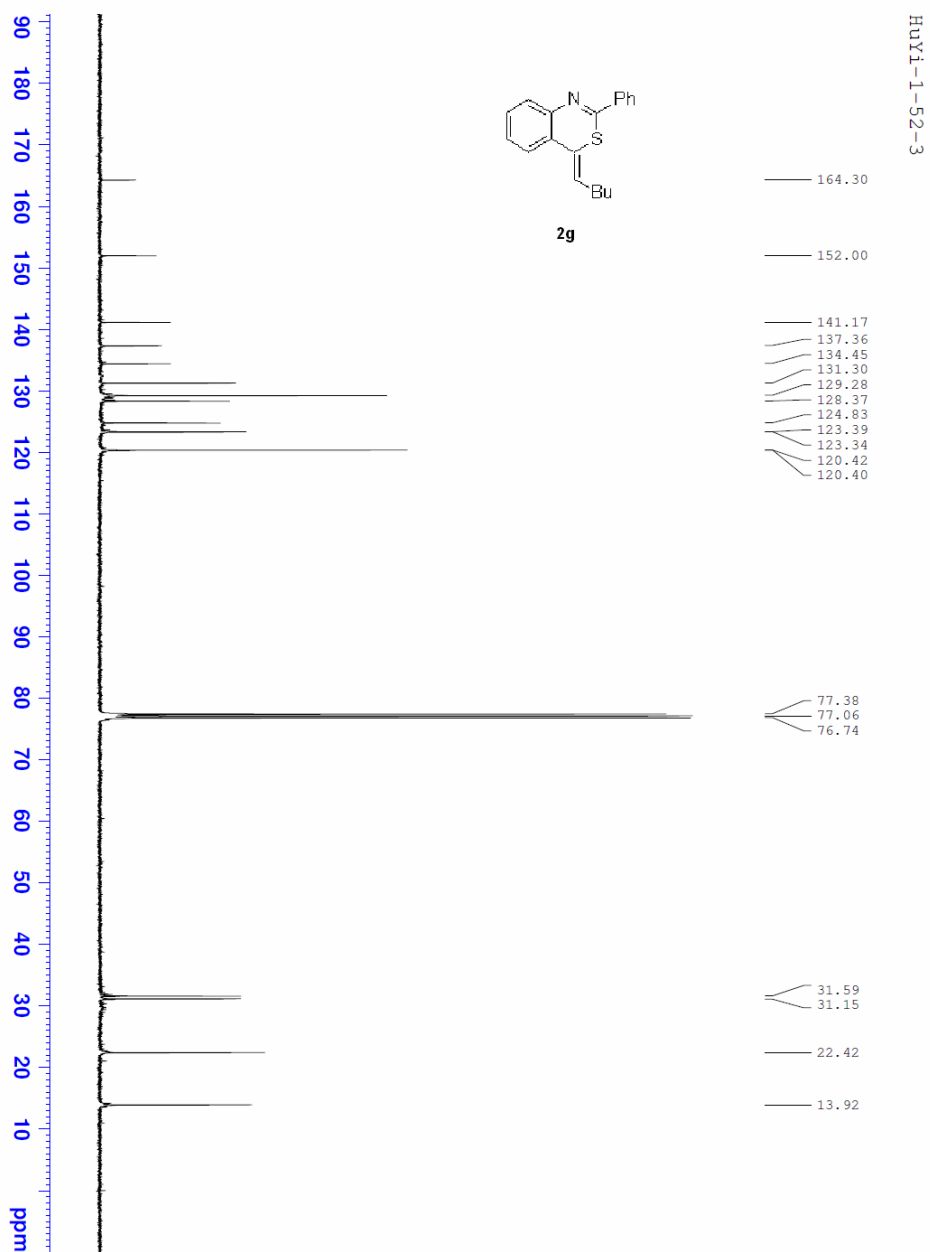

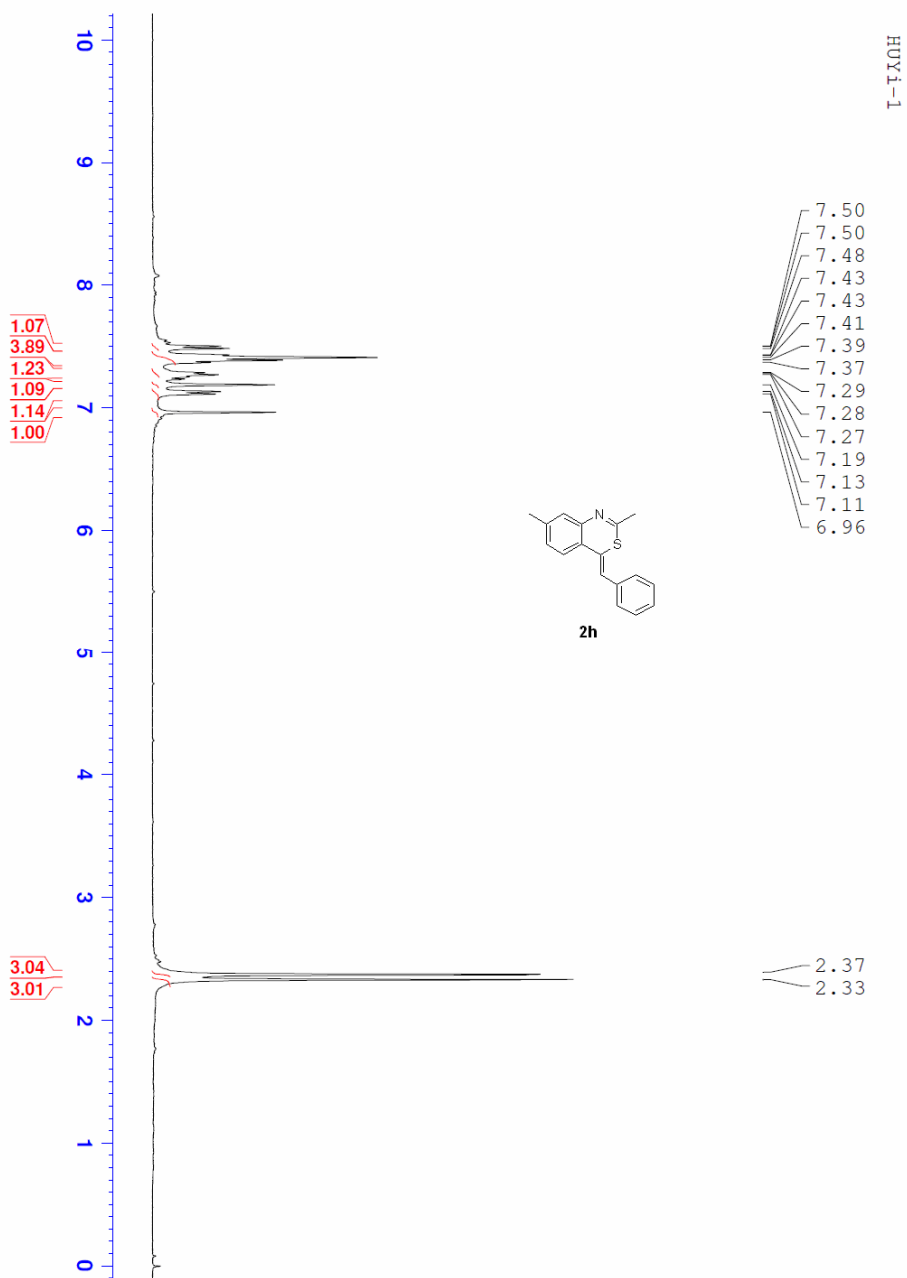

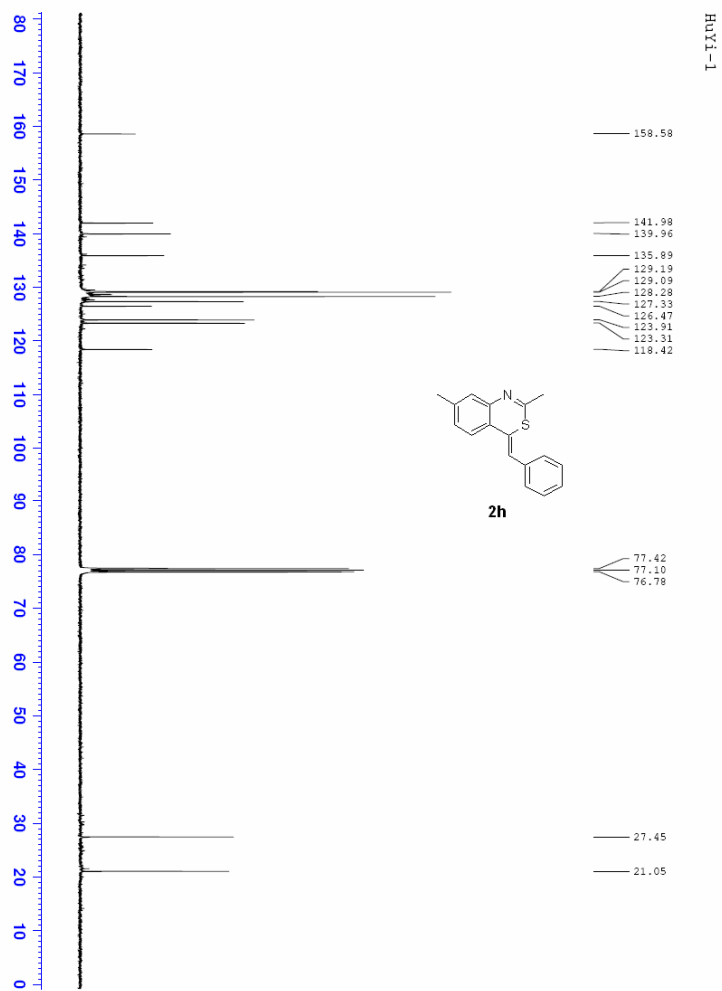

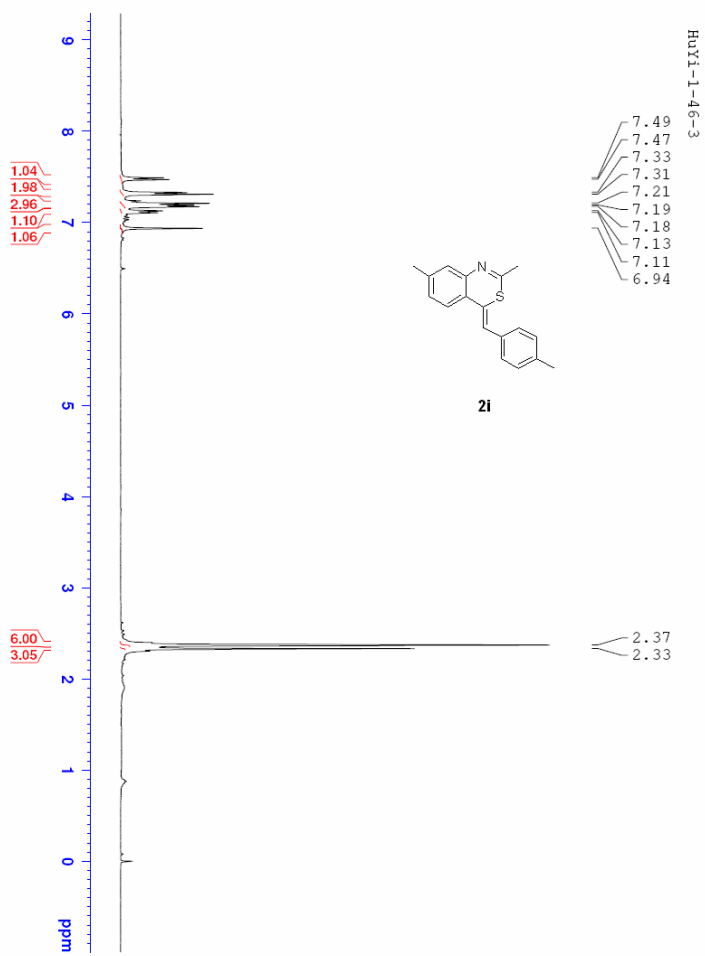

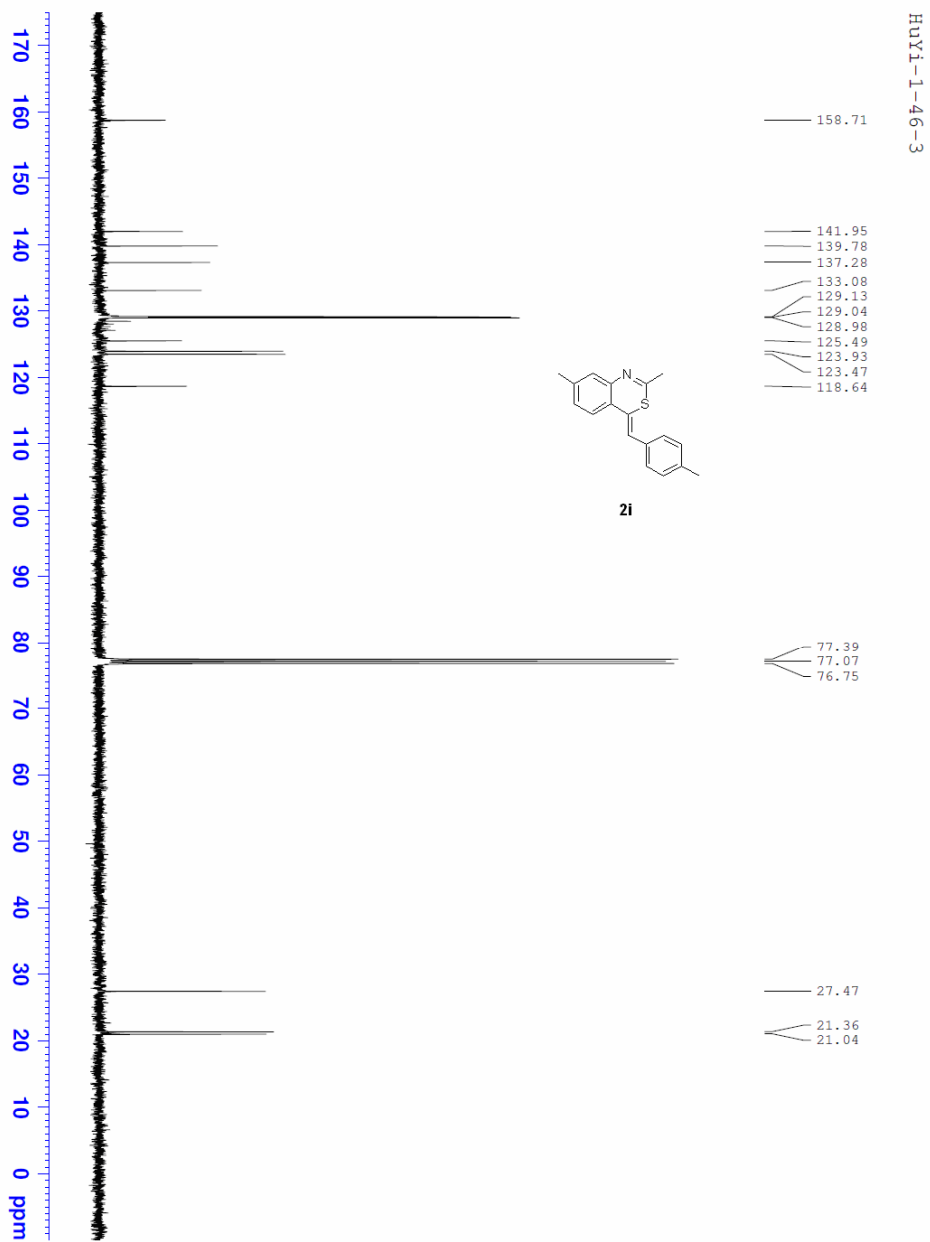



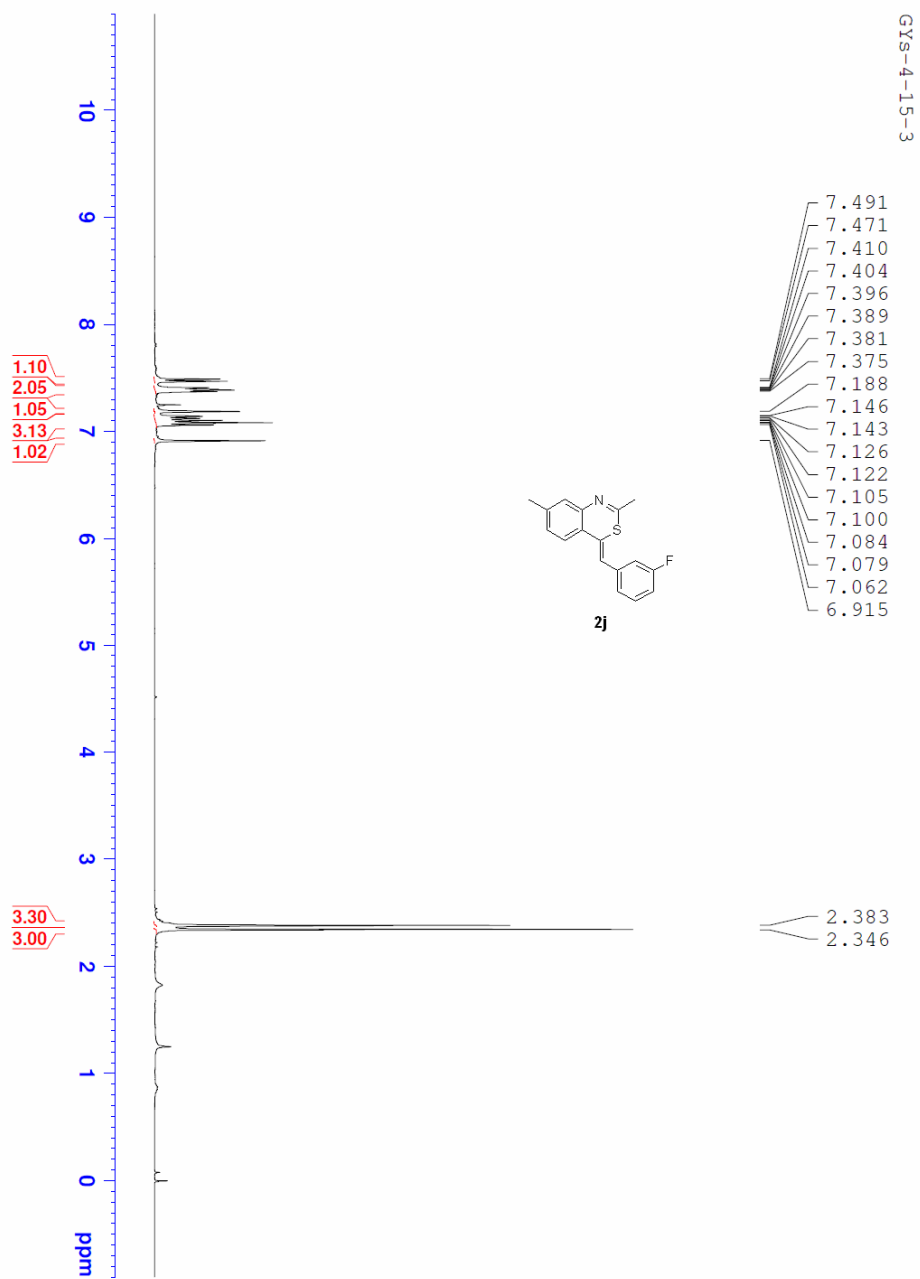

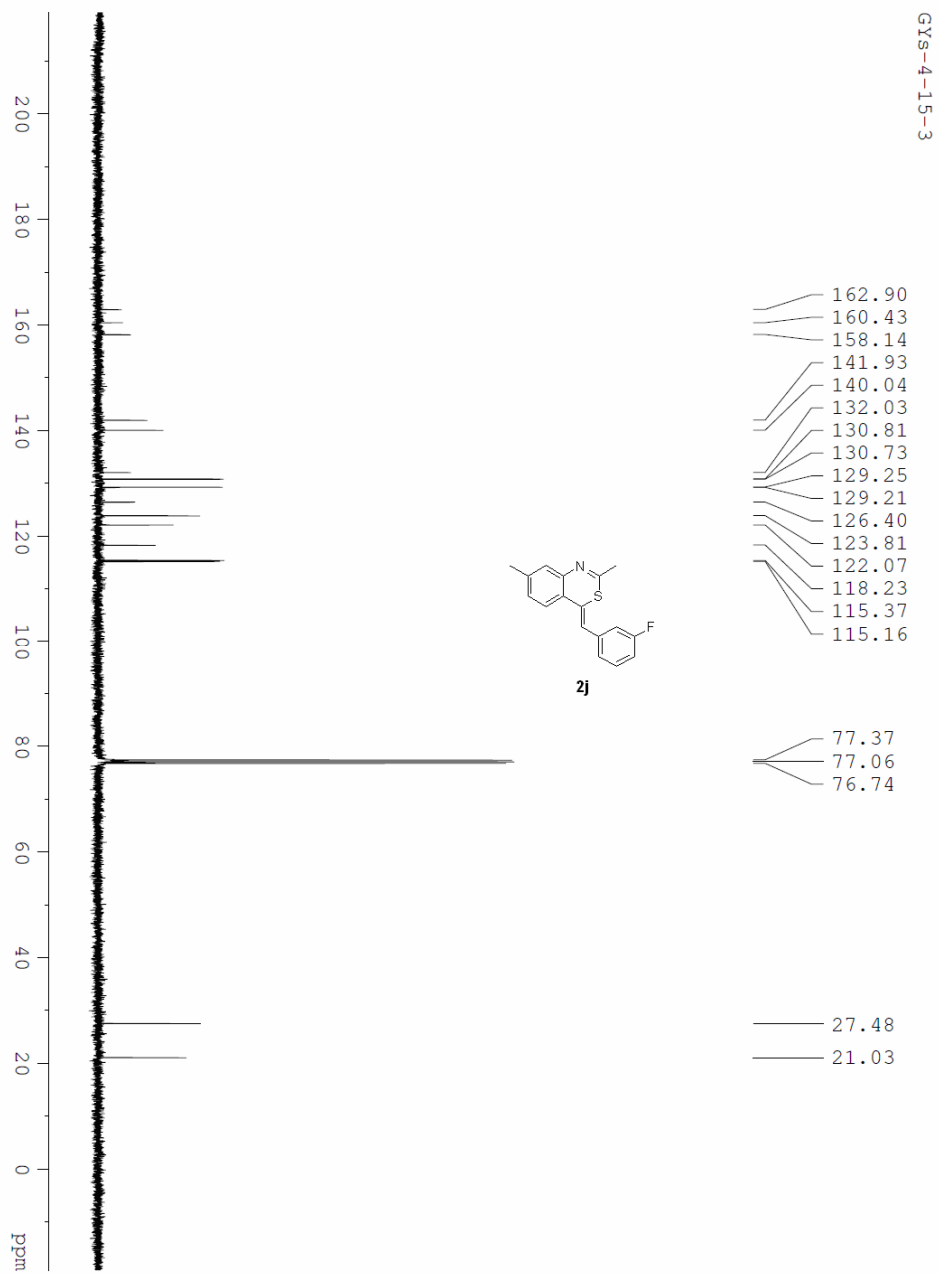

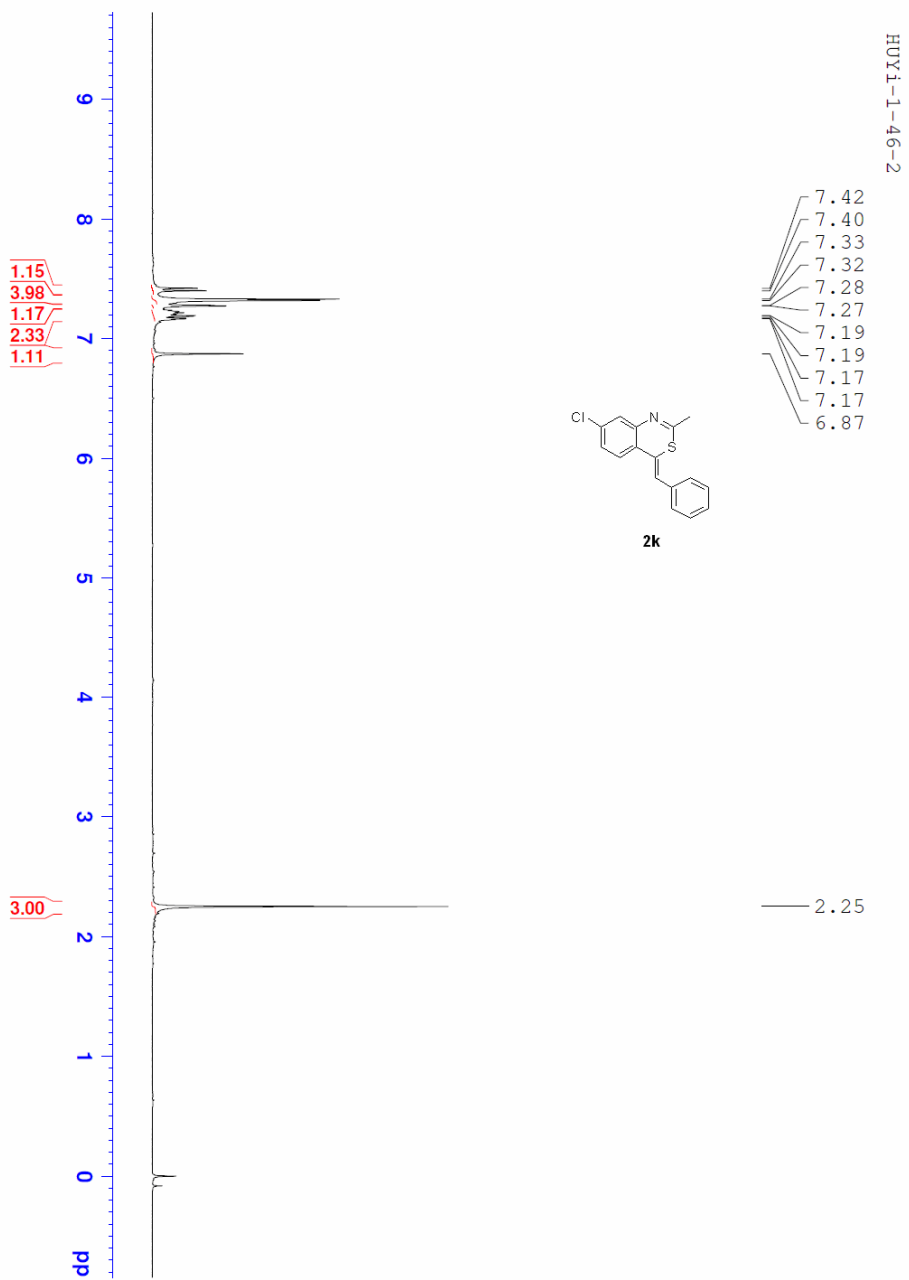

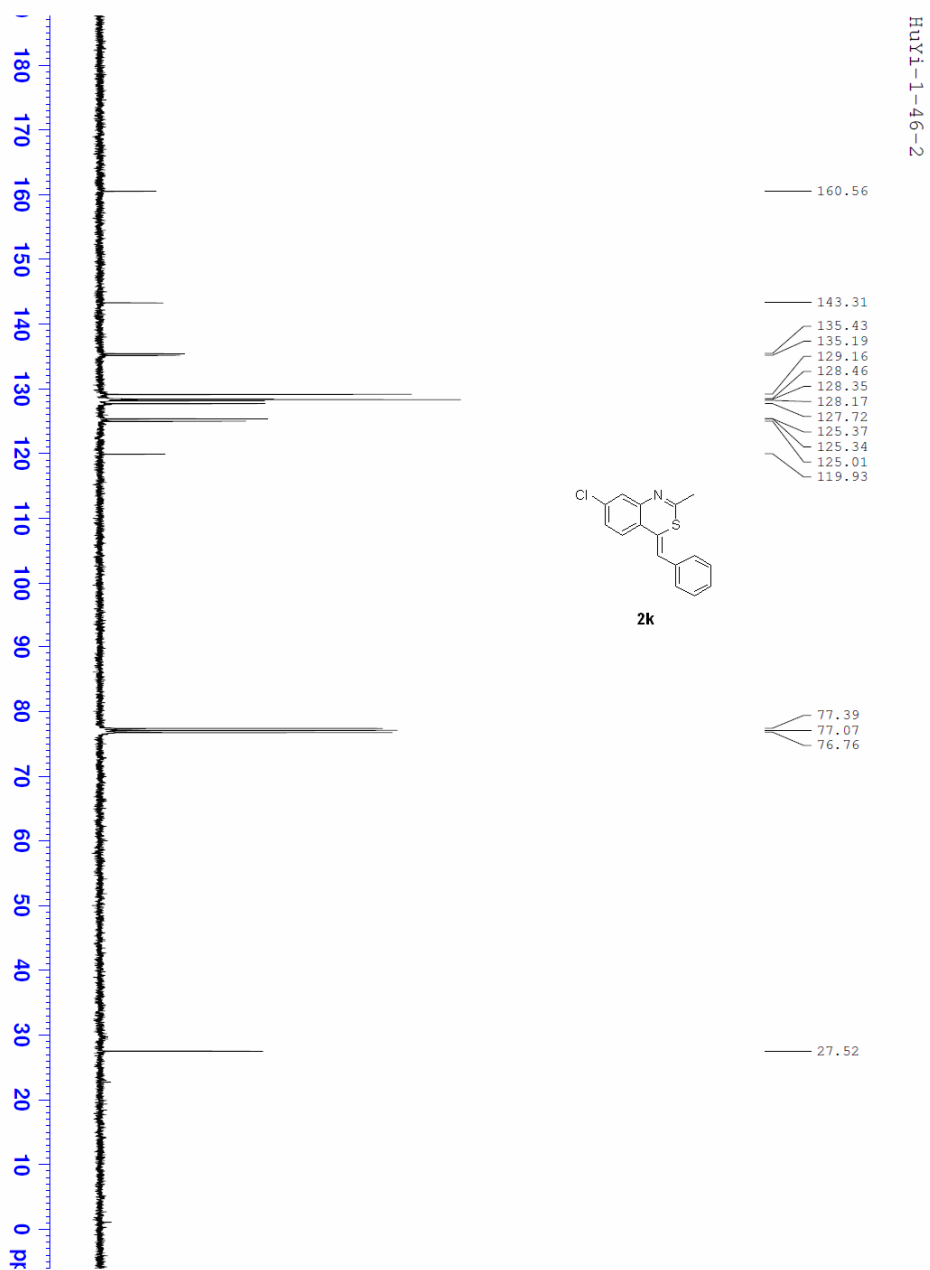

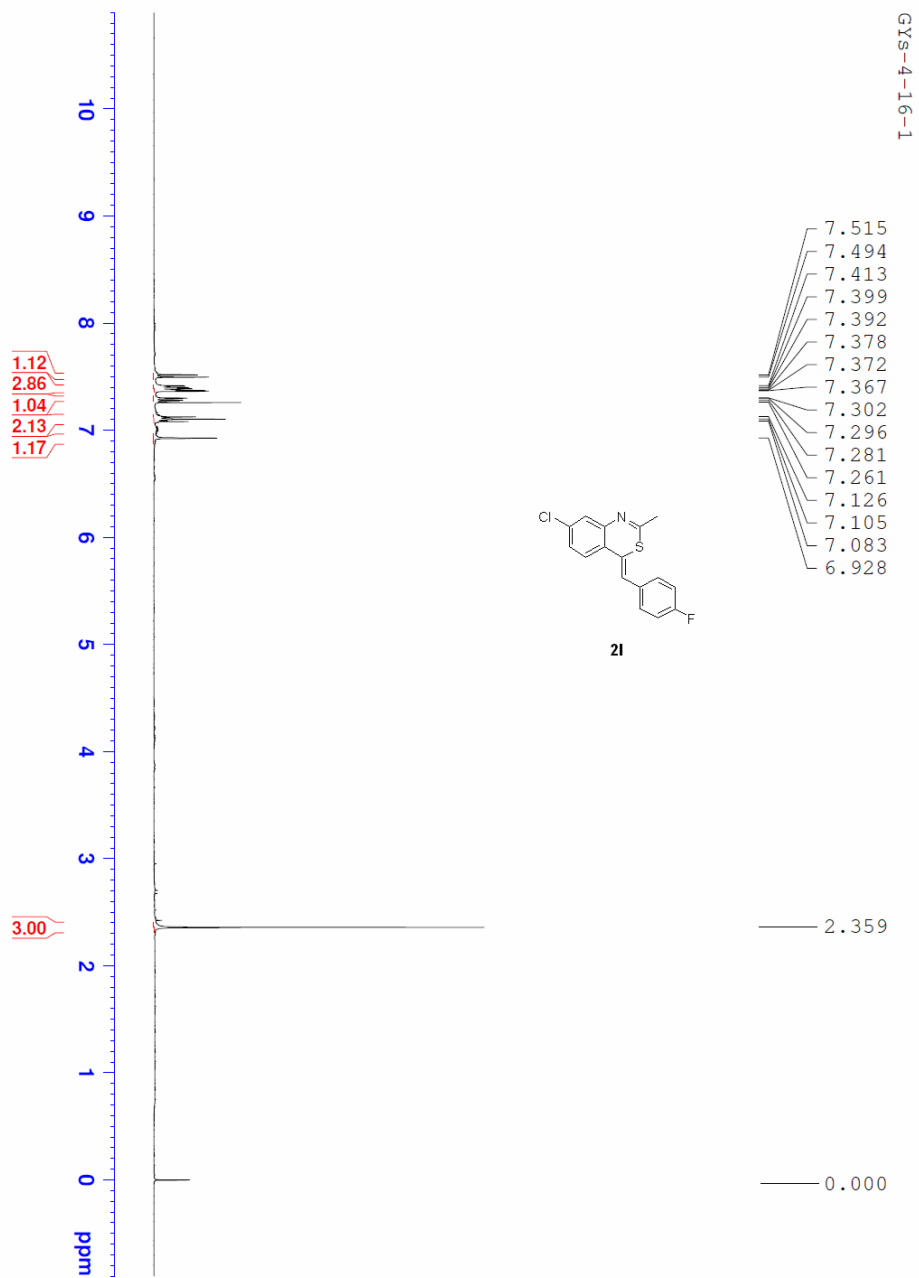

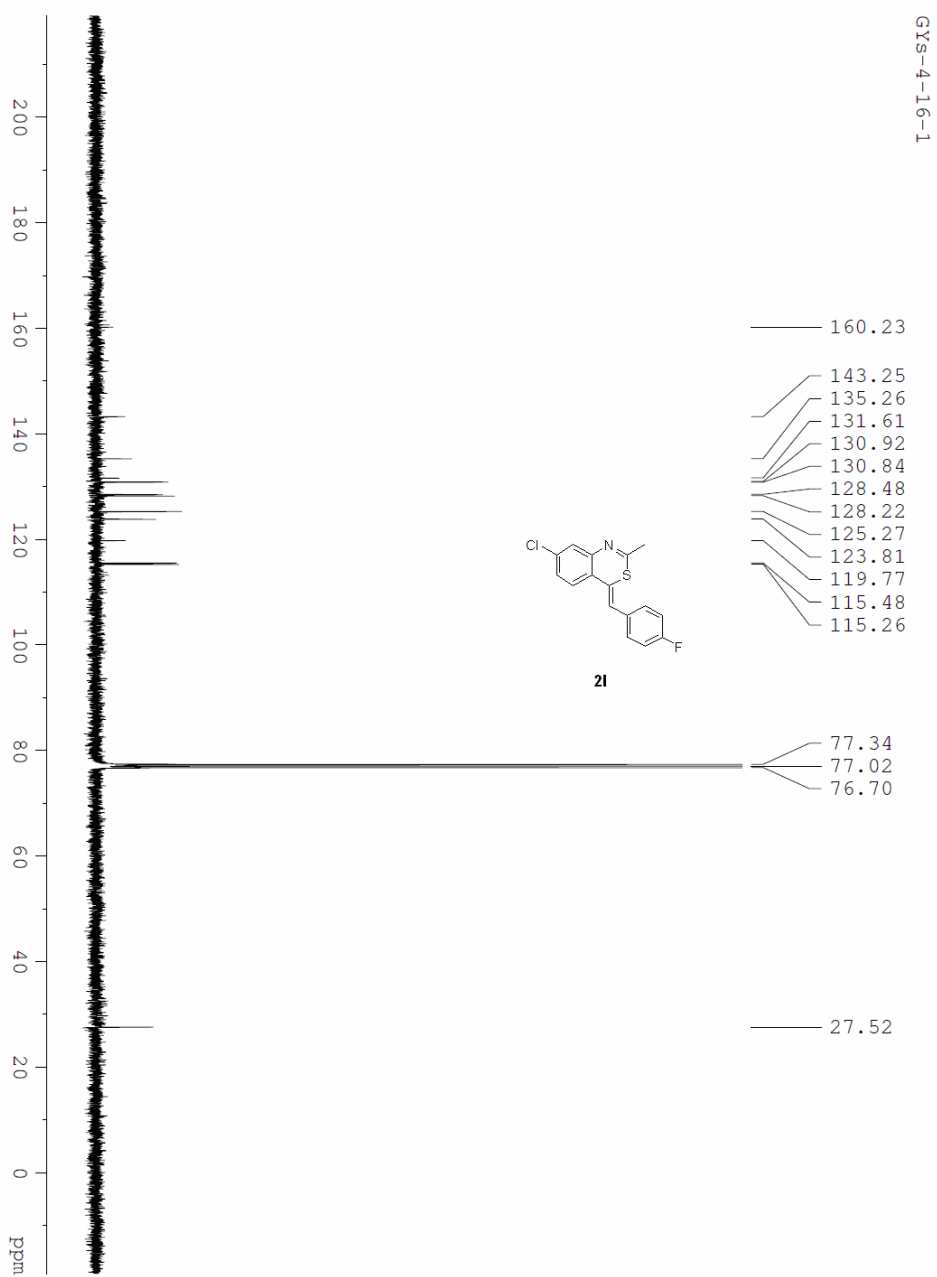

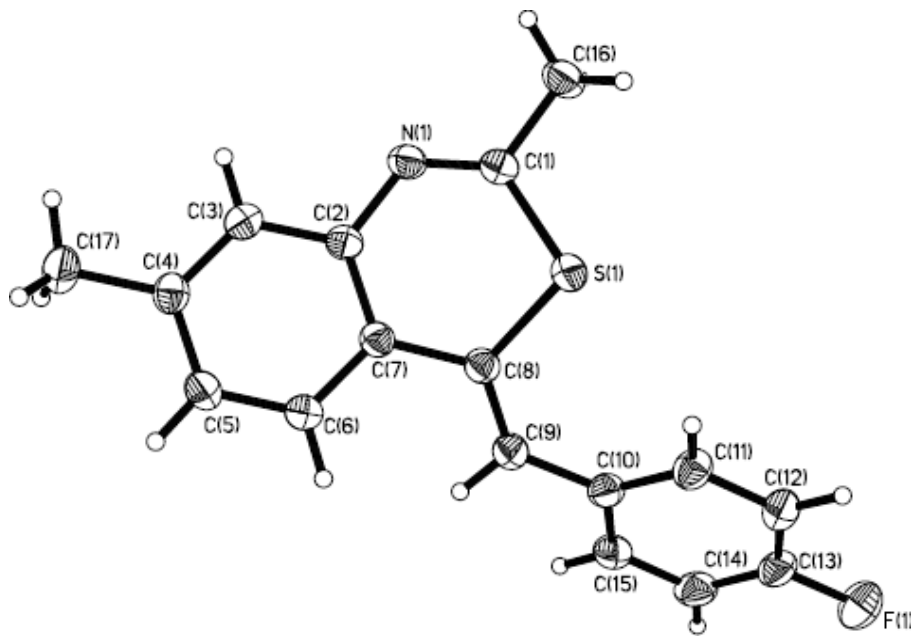

Supplement: c1cc12937f.pdf [file c1cc12937f.pdf]
